# Supplementary material for: Male reproductive traits are differentially affected by dietary macronutrient balance but unrelated to adiposity
Source: Springer Nature journal article supplement (doi:10.1038/s41467-023-38314-x), 2023-05-04
Supplement: MOESM1 [file 41467_2023_38314_MOESM1_ESM.pdf › 41467_2023_38314_MOESM1_ESM.pdf]

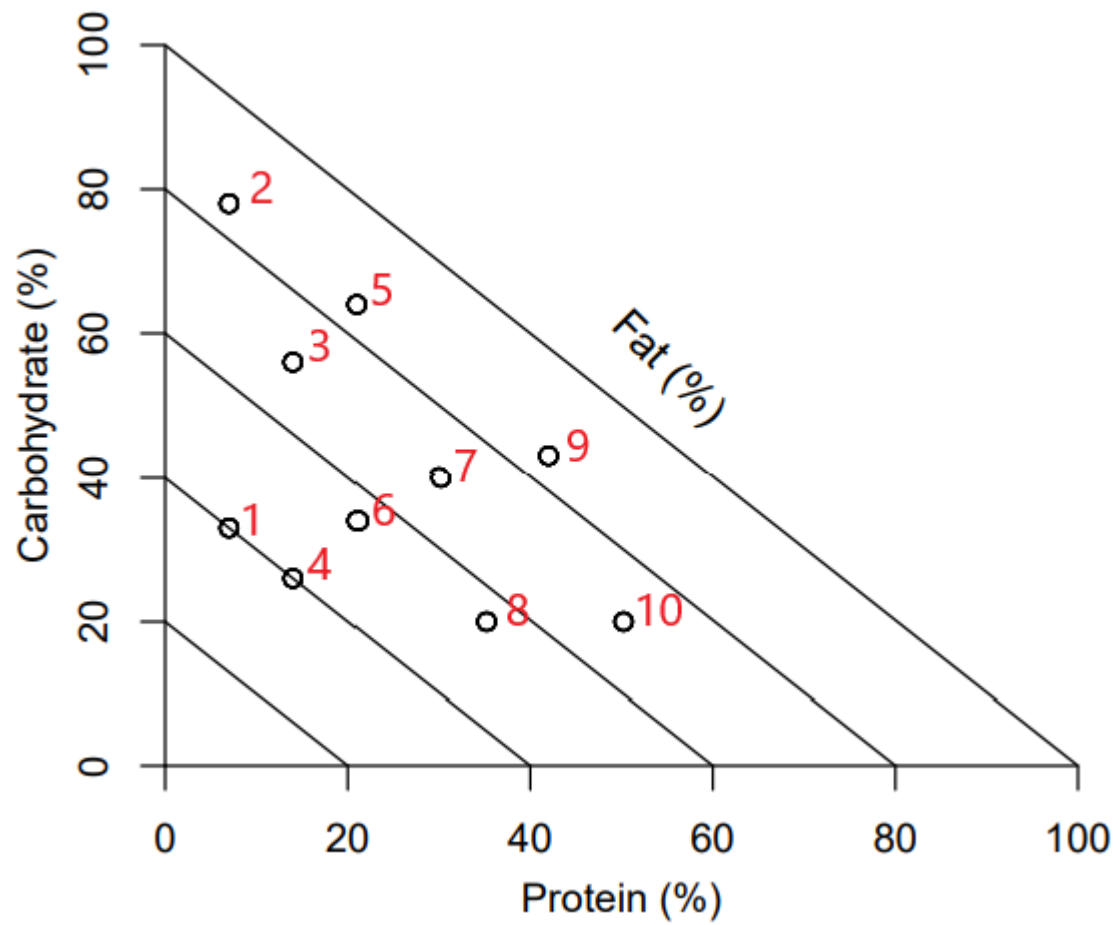

**Supplementary Figure 1.** The 10 isocaloric experimental diets represented in space on a right-angled mixture triangle. Macronutrients are given as the percentage of total kcal, with fat represented on the implicit axis (hypotenuse) and increasing in value towards the origin. Diet compositions are specified in Table I

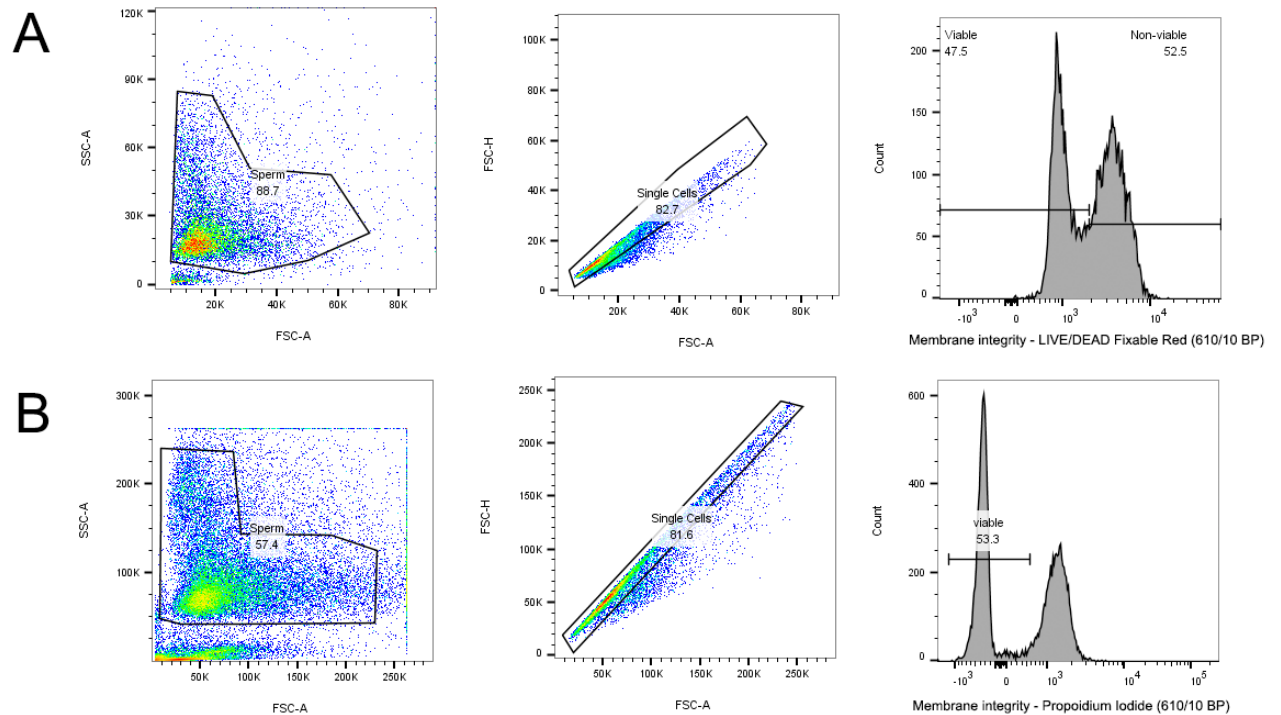

**Supplementary Figure 2.** Gating strategy for flow cytometry. All samples were gated firstly on the basis of forward and side scatter to isolate spermatozoa from debris (left hand panels), and subsequently on the basis of forward scatter area and height to isolate single cells (middle panels). For the fixable viability stain (A), a 610/10 BP histogram was used to determine the proportion of viable (unstained) spermatozoa (right hand panel). For H2DCFDA (B), the population of single cells was further gated based on a 610/10 BP histogram to discriminate the viable (PI negative) population and subsequently measure median 525/50 BP detector fluorescence (right hand panel).

**Supplementary Table 1.** Primers used for qPCR analysis of testicular gene expression

| Gene             | Source     | Forward primer             | Reverse primer             | PCR product size |
|------------------|------------|----------------------------|----------------------------|------------------|
| ACTB             | Own design | CGCAGCCACTGTCTGAGTC        | ATCCATGGCGAACTGGTGG        | 93               |
| ADH5             | Kicqstart  | CAGAAAATAAGGGTCACTCA<br>G  | GGATCGATTTTAGCAACAGAG      | 152              |
| CAT              | Kicqstart  | CTCCATCAGGTTTCTTTCTTG      | CAACAGGCAAGTTTTGATG        | 166              |
| GPX1             | Kicqstart  | GGAGAATGGCAAGAATGAAG       | TTCGCACTTCTCAAACAATG       | 97               |
| GPX4             | Kicqstart  | TGGATAAGTACAGGGGTTTC       | TAGCTGAGTGTAGTTTACGTC      | 83               |
| GSR              | Kicqstart  | GTTACAGGTTAAGGAAG          | TATTCAGATTCAGGCCCTTAG      | 162              |
| GSS              | Kicqstart  | TATGGATGACCAGGAAGTTG       | CCCAGTTCTGTGAATTATACT<br>G | 77               |
| HSD17B3          | Kicqstart  | ATCATTATTCAGGTGCTGAC       | GGATCCGGTTCAGAATTATTG      | 181              |
| NRF2<br>(NFE2L2) | Kicqstart  | CATTCCCGAATTACAGTGTC       | GGAGATCGATGAGTAAAAAT<br>GG | 124              |
| RPLP0            | Kicqstart  | GTTCTCCTATAAAAGGCACAC      | AAAGTTGGATGATCTTGAGG       | 172              |
| SOD1             | Own design | GGGAAGCATGGCGATGAAAG       | GGTTCACCGCTTGCCCTTCTG      | 93               |
| SOD2             | Kicqstart  | CCATTTTCTGGACAAACCTG       | GACCTTGCTCCTTATTGAAG       | 177              |
| SOD3             | Kicqstart  | AGAGAGAGTATTTGGGAACC       | AAACTAAGCTGCAAAGTCTC       | 104              |
| STAR             | Kicqstart  | GCGGAATATGAAAGGATTAA<br>GG | GTCACTATAGAGTGTTGCTTC      | 157              |
| TFRC             | Kicqstart  | CAGAAGTTTCTGGTAAACTGG      | TCTGCAAAAGTAATTTCCCC       | 121              |

**Diet**  
**SF19-076**

**Diet 1b: 7P 60F 33C Energy modification of  
AIN93G**

A semi-pure diet formulation for laboratory rats and mice based on AIN-93G. Some modifications have been made to the original formulation to suit locally available raw materials.

- An omega 3 to omega 6 fatty acid ratio has been set at 1:3.7. Lipids are from Soybean oil, lard and linseed oil.
- Protein is from a protein mix specified by customer made from Casein, Whey Protein Isolate and supplemented Leucine, Threonine, Methionine, Tyrosine, Phenylalanine, Tryptophan, Alanine, Aspartic Acid, Arginine, Glycine, Histidine and Serine.
- Net metabolisable energy has been set to 14.7 MJ/Kg
- Cellulose inclusion has been allowed to float to act as a filler
- This diet does not meet minimum amino acid requirements as described by Gahl et al 1991, The Journal of Nutrition and reported in NRC guidelines Nutrient Requirements for Laboratory Animals.
- See Calculated Nutritional Parameters for energy break down

**Calculated Nutritional Parameters**

|                                                                |              |
|----------------------------------------------------------------|--------------|
| Protein                                                        | 6.7%         |
| Total Fat                                                      | 24.0%        |
| Crude Fibre                                                    | 29.8%        |
| AD Fibre                                                       | 29.8%        |
| Total Carbohydrate                                             | 30.2%        |
| Net Metabolisable Energy                                       | 14.7 MJ / Kg |
| % Total calculated net metabolisable energy from lipids        | 60.0%        |
| % Total calculated net metabolisable energy from Carbohydrates | 33.0%        |
| % Total calculated net metabolisable energy from protein       | 7.0%         |

**Diet Form and Features**

- Semi pure diet. 12 mm diameter pellets.
- Pack size 1.5 Kg, vacuum packed in oxygen impermeable plastic bags, under nitrogen. Bags are packed into cardboard cartons to protect them during transit. Smaller pack quantity on request.
- Diet suitable for irradiation but not suitable for autoclave.
- Lead time 2 weeks for non-irradiation or 4 weeks for irradiation.

| Ingredients                    |           |
|--------------------------------|-----------|
| Protein Mix                    | 71 g/Kg   |
| Sucrose                        | 51 g/Kg   |
| Soybean Oil                    | 150 g/Kg  |
| Lard                           | 70 g/Kg   |
| Linseed Oil                    | 22 g/Kg   |
| Cellulose                      | 320 g/Kg  |
| Wheat Starch                   | 208 g/Kg  |
| Dextrinised Starch             | 68 g/Kg   |
| Calcium Carbonate              | 13.1 g/Kg |
| Sodium Chloride                | 2.6 g/Kg  |
| AIN93 Trace Minerals           | 1.4 g/Kg  |
| Potassium Citrate              | 2.5 g/Kg  |
| Potassium Dihydrogen Phosphate | 6.9 g/Kg  |
| Potassium Sulphate             | 1.6 g/Kg  |
| Choline Chloride (75%)         | 2.5 g/Kg  |
| AIN93 Vitamins                 | 10 g/Kg   |

| Calculated Total Vitamins as Fed |             |
|----------------------------------|-------------|
| Vitamin A (Retinol)              | 4 000 IU/Kg |
| Vitamin D (Cholecalciferol)      | 1 000 IU/Kg |
| Vitamin E (a Tocopherol acetate) | 81 mg/Kg    |
| Vitamin K (Menadione)            | 1 mg/Kg     |
| Vitamin C (Ascorbic acid)        | None added  |
| Vitamin B1 (Thiamine)            | 6.0 mg/Kg   |
| Vitamin B2 (Riboflavin)          | 6.0 mg/Kg   |
| Niacin (Nicotinic acid)          | 30 mg/Kg    |
| Vitamin B6 (Pyridoxine)          | 7 mg/Kg     |
| Pantothenic Acid                 | 16 mg/Kg    |
| Biotin                           | 200 ug/Kg   |
| Folic Acid                       | 2 mg/Kg     |
| Inositol                         | None added  |
| Vitamin B12 (Cyanocobalamin)     | 100 ug/Kg   |
| Choline                          | 2 020 mg/Kg |

| Calculated Amino Acids as Fed |                     |               |
|-------------------------------|---------------------|---------------|
|                               | Recommended Minimum | Level in Diet |
| Valine                        | 0.74%               | 0.34%         |
| Leucine                       | 1.07%               | 0.65%         |
| Isoleucine                    | 0.62%               | 0.30%         |
| Threonine                     | 0.62%               | 0.39%         |
| Methionine*                   | 0.98%               | 0.24%         |
| Cysteine                      |                     | 0.07%         |
| Lysine                        | 0.92%               | 0.43%         |
| Phenylalanine°                | 1.02%               | 0.26%         |
| Tyrosine                      |                     | 0.26%         |
| Tryptophan                    | 0.20%               | 0.11%         |
| Alanine                       |                     | 0.30%         |
| Aspartic Acid                 |                     | 0.38%         |
| Glutamic Acid                 |                     | 0.59%         |
| Proline                       |                     | 0.44%         |
| Asparagine                    |                     | 0.19%         |
| Glutamine                     |                     | 0.42%         |
| Arginine                      | 0.48%               | 0.51%         |
| Glycine                       |                     | 0.23%         |
| Histidine                     | 0.28%               | 0.19%         |
| Serine                        |                     | 0.42%         |

\*One half of L-Methionine can be replaced with L-Cystine

°One Half of L-Phenylalanine can be replaced with L-Tyrosine

| Calculated Total Minerals as Fed |            | Calculated Fatty Acid Composition as Fed |         |
|----------------------------------|------------|------------------------------------------|---------|
| Calcium                          | 0.69%      | Saturated Fats C12:0 and less            | 0.02%   |
| Phosphorous                      | 0.21%      | Myristic Acid 14:0                       | 0.12%   |
| Magnesium                        | 0.06%      | Palmitic Acid 16:0                       | 3.50%   |
| Sodium                           | 0.15%      | Stearic Acid 18:0                        | 1.84%   |
| Chloride                         | 0.16%      | Palmitoleic Acid 16:1                    | 0.15%   |
| Potassium                        | 0.41%      | Oleic Acid 18:1                          | 6.13%   |
| Sulphur                          | 0.11%      | Gadoleic Acid 20:1                       | 0.08%   |
| Iron                             | 50 mg/Kg   | Linoleic Acid 18:2 n6                    | 8.95%   |
| Copper                           | 8.5 mg/Kg  | a Linolenic Acid 18:3 n3                 | 2.40%   |
| Iodine                           | 0.2 mg/Kg  | Arachadonic Acid 20:4 n6                 | No data |
| Manganese                        | 22 mg/Kg   | EPA 20:5 n3                              | No data |
| Cobalt                           | No data    | DHA 22:6 n3                              | No data |
| Zinc                             | 40 mg/Kg   | Total n3                                 | 2.41%   |
| Molybdenum                       | 0.15 mg/Kg | Total n6                                 | 8.96%   |
| Selenium                         | 0.2 mg/Kg  | Total Mono Unsaturated Fats              | 6.39%   |
| Cadmium                          | No data    | Total Polyunsaturated Fats               | 11.41%  |
| Chromium                         | 1.0 mg/Kg  | Total Saturated Fats                     | 5.57%   |
| Fluoride                         | 1.0 mg/Kg  |                                          |         |
| Lithium                          | 0.1 mg/Kg  |                                          |         |
| Boron                            | 1.2 mg/Kg  |                                          |         |
| Nickel                           | 0.5 mg/Kg  |                                          |         |
| Vanadium                         | 0.1 mg/Kg  |                                          |         |

Calculated data uses information from typical raw material composition. It could be expected that individual batches of diet will vary from this figure. **Diet post treatment by irradiation or autoclave could change these parameters.** We are happy to provide full calculated nutritional information for all of our products, however we would like to emphasise that these diets have been specifically designed for manufacture by Specialty Feeds.

**Diet  
SF19-077**

**Diet 2b: 7P 15F 78C Energy modification of  
AIN93G**

A semi-pure diet formulation for laboratory rats and mice based on AIN-93G. Some modifications have been made to the original formulation to suit locally available raw materials.

- An omega 3 to omega 6 fatty acid ratio has been set at 1:3.7. Lipids are from Soybean oil, lard and linseed oil.
- Protein is from a protein mix specified by customer made from Casein, Whey Protein Isolate and supplemented Leucine, Threonine, Methionine, Tyrosine, Phenylalanine, Tryptophan, Alanine, Aspartic Acid, Arginine, Glycine, Histidine and Serine.
- Net metabolisable energy has been set to 14.7 MJ/Kg
- Cellulose inclusion has been allowed to float to act as a filler
- This diet does not meet minimum amino acid requirements as described by Gahl et al 1991, The Journal of Nutrition and reported in NRC guidelines Nutrient Requirements for Laboratory Animals.
- See Calculated Nutritional Parameters for energy break down

**Calculated Nutritional Parameters**

|                                                                |              |
|----------------------------------------------------------------|--------------|
| Protein                                                        | 6.7%         |
| Total Fat                                                      | 6.0%         |
| Crude Fibre                                                    | 3.7%         |
| AD Fibre                                                       | 3.7%         |
| Total Carbohydrate                                             | 71.3%        |
| Net Metabolisable Energy                                       | 14.7 MJ / Kg |
| % Total calculated net metabolisable energy from lipids        | 15.0%        |
| % Total calculated net metabolisable energy from Carbohydrates | 78.0%        |
| % Total calculated net metabolisable energy from protein       | 7.0%         |

**Diet Form and Features**

- Semi pure diet. 12 mm diameter pellets.
- Pack size 5 Kg, vacuum packed in oxygen impermeable plastic bags, under nitrogen. Bags are packed into cardboard cartons to protect them during transit. Smaller pack quantity on request.
- Diet suitable for irradiation but not suitable for autoclave.
- Lead time 2 weeks for non-irradiation or 4 weeks for irradiation.

| Ingredients                    |           |
|--------------------------------|-----------|
| Protein Mix                    | 71 g/Kg   |
| Sucrose                        | 124 g/Kg  |
| Soybean Oil                    | 37 g/Kg   |
| Lard                           | 17.5 g/Kg |
| Linseed Oil                    | 5.4 g/Kg  |
| Cellulose                      | 40 g/Kg   |
| Wheat Starch                   | 501 g/Kg  |
| Dextrinised Starch             | 163 g/Kg  |
| Calcium Carbonate              | 13.1 g/Kg |
| Sodium Chloride                | 2.6 g/Kg  |
| AIN93 Trace Minerals           | 1.4 g/Kg  |
| Potassium Citrate              | 2.5 g/Kg  |
| Potassium Dihydrogen Phosphate | 6.9 g/Kg  |
| Potassium Sulphate             | 1.6 g/Kg  |
| Choline Chloride (75%)         | 2.5 g/Kg  |
| AIN93 Vitamins                 | 10 g/Kg   |

| Calculated Total Vitamins as Fed |             |
|----------------------------------|-------------|
| Vitamin A (Retinol)              | 4 000 IU/Kg |
| Vitamin D (Cholecalciferol)      | 1 000 IU/Kg |
| Vitamin E (a Tocopherol acetate) | 77 mg/Kg    |
| Vitamin K (Menadione)            | 1 mg/Kg     |
| Vitamin C (Ascorbic acid)        | None added  |
| Vitamin B1 (Thiamine)            | 6.0 mg/Kg   |
| Vitamin B2 (Riboflavin)          | 6.0 mg/Kg   |
| Niacin (Nicotinic acid)          | 30 mg/Kg    |
| Vitamin B6 (Pyridoxine)          | 7 mg/Kg     |
| Pantothenic Acid                 | 16 mg/Kg    |
| Biotin                           | 200 ug/Kg   |
| Folic Acid                       | 2 mg/Kg     |
| Inositol                         | None added  |
| Vitamin B12 (Cyanocobalamin)     | 100 ug/Kg   |
| Choline                          | 2 150 mg/Kg |

| Calculated Amino Acids as Fed |                     |               |
|-------------------------------|---------------------|---------------|
|                               | Recommended Minimum | Level in Diet |
| Valine                        | 0.74%               | 0.34%         |
| Leucine                       | 1.07%               | 0.65%         |
| Isoleucine                    | 0.62%               | 0.30%         |
| Threonine                     | 0.62%               | 0.39%         |
| Methionine*                   | 0.98%               | 0.24%         |
| Cysteine                      |                     | 0.07%         |
| Lysine                        | 0.92%               | 0.43%         |
| Phenylalanine°                | 1.02%               | 0.26%         |
| Tyrosine                      |                     | 0.26%         |
| Tryptophan                    | 0.20%               | 0.11%         |
| Alanine                       |                     | 0.30%         |
| Aspartic Acid                 |                     | 0.38%         |
| Glutamic Acid                 |                     | 0.59%         |
| Proline                       |                     | 0.44%         |
| Asparagine                    |                     | 0.19%         |
| Glutamine                     |                     | 0.42%         |
| Arginine                      | 0.48%               | 0.51%         |
| Glycine                       |                     | 0.23%         |
| Histidine                     | 0.28%               | 0.19%         |
| Serine                        |                     | 0.42%         |

\*One half of L-Methionine can be replaced with L-Cystine

°One Half of L-Phenylalanine can be replaced with L-Tyrosine



| Calculated Total Minerals as Fed |            | Calculated Fatty Acid Composition as Fed |         |
|----------------------------------|------------|------------------------------------------|---------|
| Calcium                          | 0.69%      | Saturated Fats C12:0 and less            | 0.01%   |
| Phosphorous                      | 0.24%      | Myristic Acid 14:0                       | 0.03%   |
| Magnesium                        | 0.06%      | Palmitic Acid 16:0                       | 0.88%   |
| Sodium                           | 0.15%      | Stearic Acid 18:0                        | 0.46%   |
| Chloride                         | 0.16%      | Palmitoleic Acid 16:1                    | 0.04%   |
| Potassium                        | 0.41%      | Oleic Acid 18:1                          | 1.53%   |
| Sulphur                          | 0.12%      | Gadoleic Acid 20:1                       | 0.02%   |
| Iron                             | 50 mg/Kg   | Linoleic Acid 18:2 n6                    | 2.24%   |
| Copper                           | 6.9 mg/Kg  | a Linolenic Acid 18:3 n3                 | 0.60%   |
| Iodine                           | 0.2 mg/Kg  | Arachadonic Acid 20:4 n6                 | No data |
| Manganese                        | 16 mg/Kg   | EPA 20:5 n3                              | No data |
| Cobalt                           | No data    | DHA 22:6 n3                              | No data |
| Zinc                             | 40 mg/Kg   | Total n3                                 | 0.60%   |
| Molybdenum                       | 0.15 mg/Kg | Total n6                                 | 2.24%   |
| Selenium                         | 0.2 mg/Kg  | Total Mono Unsaturated Fats              | 1.6%    |
| Cadmium                          | No data    | Total Polyunsaturated Fats               | 2.85%   |
| Chromium                         | 1.0 mg/Kg  | Total Saturated Fats                     | 1.39%   |
| Fluoride                         | 1.0 mg/Kg  |                                          |         |
| Lithium                          | 0.1 mg/Kg  |                                          |         |
| Boron                            | 2.0 mg/Kg  |                                          |         |
| Nickel                           | 0.5 mg/Kg  |                                          |         |
| Vanadium                         | 0.1 mg/Kg  |                                          |         |

Calculated data uses information from typical raw material composition. It could be expected that individual batches of diet will vary from this figure. **Diet post treatment by irradiation or autoclave could change these parameters.** We are happy to provide full calculated nutritional information for all of our products, however we would like to emphasise that these diets have been specifically designed for manufacture by Specialty Feeds.

**Diet  
SF19-078**

**Diet 3b: 14P 30F 56C Energy modification of  
AIN93G**

A semi-pure diet formulation for laboratory rats and mice based on AIN-93G. Some modifications have been made to the original formulation to suit locally available raw materials.

- An omega 3 to omega 6 fatty acid ratio has been set at 1:3.7. Lipids are from Soybean oil, lard and linseed oil.
- Protein is from a protein mix specified by customer made from Casein, Whey Protein Isolate and supplemented Leucine, Threonine, Methionine, Tyrosine, Phenylalanine, Tryptophan, Alanine, Aspartic Acid, Arginine, Glycine, Histidine and Serine.
- Net metabolisable energy has been set to 14.7 MJ/Kg
- Cellulose inclusion has been allowed to float to act as a filler
- This diet does not meet minimum amino acid requirements as described by Gahl et al 1991, The Journal of Nutrition and reported in NRC guidelines Nutrient Requirements for Laboratory Animals.
- See Calculated Nutritional Parameters for energy break down

**Calculated Nutritional Parameters**

|                                                                |              |
|----------------------------------------------------------------|--------------|
| Protein                                                        | 13.5%        |
| Total Fat                                                      | 12.0%        |
| Crude Fibre                                                    | 12.4%        |
| AD Fibre                                                       | 12.4%        |
| Total Carbohydrate                                             | 51.3%        |
| Net Metabolisable Energy                                       | 14.7 MJ / Kg |
| % Total calculated net metabolisable energy from lipids        | 30.0%        |
| % Total calculated net metabolisable energy from Carbohydrates | 56.0%        |
| % Total calculated net metabolisable energy from protein       | 14.0%        |

**Diet Form and Features**

- Semi pure diet. 12 mm diameter pellets.
- Pack size 5 Kg, vacuum packed in oxygen impermeable plastic bags, under nitrogen. Bags are packed into cardboard cartons to protect them during transit. Smaller pack quantity on request.
- Diet suitable for irradiation but not suitable for autoclave.
- Lead time 2 weeks for non-irradiation or 4 weeks for irradiation.

| Ingredients                    |           |
|--------------------------------|-----------|
| Protein Mix                    | 142 g/Kg  |
| Sucrose                        | 88 g/Kg   |
| Soybean Oil                    | 75 g/Kg   |
| Lard                           | 35 g/Kg   |
| Linseed Oil                    | 11 g/Kg   |
| Cellulose                      | 134 g/Kg  |
| Wheat Starch                   | 358 g/Kg  |
| Dextrinised Starch             | 117 g/Kg  |
| Calcium Carbonate              | 13.1 g/Kg |
| Sodium Chloride                | 2.6 g/Kg  |
| AIN93 Trace Minerals           | 1.4 g/Kg  |
| Potassium Citrate              | 2.5 g/Kg  |
| Potassium Dihydrogen Phosphate | 6.9 g/Kg  |
| Potassium Sulphate             | 1.6 g/Kg  |
| Choline Chloride (75%)         | 2.5 g/Kg  |
| AIN93 Vitamins                 | 10 g/Kg   |

| Calculated Total Vitamins as Fed |             |
|----------------------------------|-------------|
| Vitamin A (Retinol)              | 4 000 IU/Kg |
| Vitamin D (Cholecalciferol)      | 1 000 IU/Kg |
| Vitamin E (a Tocopherol acetate) | 78 mg/Kg    |
| Vitamin K (Menadione)            | 1 mg/Kg     |
| Vitamin C (Ascorbic acid)        | None added  |
| Vitamin B1 (Thiamine)            | 6.0 mg/Kg   |
| Vitamin B2 (Riboflavin)          | 6.0 mg/Kg   |
| Niacin (Nicotinic acid)          | 30 mg/Kg    |
| Vitamin B6 (Pyridoxine)          | 7 mg/Kg     |
| Pantothenic Acid                 | 16 mg/Kg    |
| Biotin                           | 200 ug/Kg   |
| Folic Acid                       | 2 mg/Kg     |
| Inositol                         | None added  |
| Vitamin B12 (Cyanocobalamin)     | 101 ug/Kg   |
| Choline                          | 2 100 mg/Kg |

| Calculated Amino Acids as Fed |                     |               |
|-------------------------------|---------------------|---------------|
|                               | Recommended Minimum | Level in Diet |
| Valine                        | 0.74%               | 0.67%         |
| Leucine                       | 1.07%               | 1.30%         |
| Isoleucine                    | 0.62%               | 0.59%         |
| Threonine                     | 0.62%               | 0.78%         |
| Methionine*                   | 0.98%               | 0.48%         |
| Cysteine                      |                     | 0.15%         |
| Lysine                        | 0.92%               | 0.86%         |
| Phenylalanine°                | 1.02%               | 0.53%         |
| Tyrosine                      |                     | 0.51%         |
| Tryptophan                    | 0.20%               | 0.23%         |
| Alanine                       |                     | 0.60%         |
| Aspartic Acid                 |                     | 0.76%         |
| Glutamic Acid                 |                     | 1.18%         |
| Proline                       |                     | 0.87%         |
| Asparagine                    |                     | 0.38%         |
| Glutamine                     |                     | 0.84%         |
| Arginine                      | 0.48%               | 1.03%         |
| Glycine                       |                     | 0.47%         |
| Histidine                     | 0.28%               | 0.38%         |
| Serine                        |                     | 0.83%         |

\*One half of L-Methionine can be replaced with L-Cystine

°One Half of L-Phenylalanine can be replaced with L-Tyrosine

| Calculated Total Minerals as Fed |            | Calculated Fatty Acid Composition as Fed |         |
|----------------------------------|------------|------------------------------------------|---------|
| Calcium                          | 0.69%      | Saturated Fats C12:0 and less            | 0.01%   |
| Phosphorous                      | 0.25%      | Myristic Acid 14:0                       | 0.06%   |
| Magnesium                        | 0.06%      | Palmitic Acid 16:0                       | 1.75%   |
| Sodium                           | 0.15%      | Stearic Acid 18:0                        | 0.92%   |
| Chloride                         | 0.16%      | Palmitoleic Acid 16:1                    | 0.08%   |
| Potassium                        | 0.44%      | Oleic Acid 18:1                          | 3.06%   |
| Sulphur                          | 0.18%      | Gadoleic Acid 20:1                       | 0.04%   |
| Iron                             | 50 mg/Kg   | Linoleic Acid 18:2 n6                    | 4.48%   |
| Copper                           | 7.4 mg/Kg  | a Linolenic Acid 18:3 n3                 | 1.20%   |
| Iodine                           | 0.2 mg/Kg  | Arachadonic Acid 20:4 n6                 | No data |
| Manganese                        | 18 mg/Kg   | EPA 20:5 n3                              | No data |
| Cobalt                           | No data    | DHA 22:6 n3                              | No data |
| Zinc                             | 41 mg/Kg   | Total n3                                 | 1.21%   |
| Molybdenum                       | 0.15 mg/Kg | Total n6                                 | 4.48%   |
| Selenium                         | 0.3 mg/Kg  | Total Mono Unsaturated Fats              | 3.19%   |
| Cadmium                          | No data    | Total Polyunsaturated Fats               | 5.70%   |
| Chromium                         | 1.0 mg/Kg  | Total Saturated Fats                     | 2.78%   |
| Fluoride                         | 1.0 mg/Kg  |                                          |         |
| Lithium                          | 0.1 mg/Kg  |                                          |         |
| Boron                            | 1.8 mg/Kg  |                                          |         |
| Nickel                           | 0.5 mg/Kg  |                                          |         |
| Vanadium                         | 0.1 mg/Kg  |                                          |         |

Calculated data uses information from typical raw material composition. It could be expected that individual batches of diet will vary from this figure. **Diet post treatment by irradiation or autoclave could change these parameters.** We are happy to provide full calculated nutritional information for all of our products, however we would like to emphasise that these diets have been specifically designed for manufacture by Specialty Feeds.

**Diet  
SF19-079**

**Diet 4b: 14P 60F 26C Energy modification of  
AIN93G**

A semi-pure diet formulation for laboratory rats and mice based on AIN-93G. Some modifications have been made to the original formulation to suit locally available raw materials.

- An omega 3 to omega 6 fatty acid ratio has been set at 1:3.7. Lipids are from Soybean oil, lard and linseed oil.
- Protein is from a protein mix specified by customer made from Casein, Whey Protein Isolate and supplemented Leucine, Threonine, Methionine, Tyrosine, Phenylalanine, Tryptophan, Alanine, Aspartic Acid, Arginine, Glycine, Histidine and Serine.
- Net metabolisable energy has been set to 14.7 MJ/Kg
- Cellulose inclusion has been allowed to float to act as a filler
- This diet does not meet minimum amino acid requirements as described by Gahl et al 1991, The Journal of Nutrition and reported in NRC guidelines Nutrient Requirements for Laboratory Animals.
- See Calculated Nutritional Parameters for energy break down

**Calculated Nutritional Parameters**

|                                                                |              |
|----------------------------------------------------------------|--------------|
| Protein                                                        | 13.5%        |
| Total Fat                                                      | 24.0%        |
| Crude Fibre                                                    | 29.8%        |
| AD Fibre                                                       | 29.8%        |
| Total Carbohydrate                                             | 23.8%        |
| Net Metabolisable Energy                                       | 14.7 MJ / Kg |
| % Total calculated net metabolisable energy from lipids        | 60.0%        |
| % Total calculated net metabolisable energy from Carbohydrates | 26.0%        |
| % Total calculated net metabolisable energy from protein       | 14.0%        |

**Diet Form and Features**

- Semi pure diet. 12 mm diameter pellets.
- Pack size 1.5 Kg, vacuum packed in oxygen impermeable plastic bags, under nitrogen. Bags are packed into cardboard cartons to protect them during transit. Smaller pack quantity on request.
- Diet suitable for irradiation but not suitable for autoclave.
- Lead time 2 weeks for non-irradiation or 4 weeks for irradiation.

| Ingredients                    |           |
|--------------------------------|-----------|
| Protein Mix                    | 142 g/Kg  |
| Sucrose                        | 40 g/Kg   |
| Soybean Oil                    | 150 g/Kg  |
| Lard                           | 70 g/Kg   |
| Linseed Oil                    | 21.5 g/Kg |
| Cellulose                      | 320 g/Kg  |
| Wheat Starch                   | 163 g/Kg  |
| Dextrinised Starch             | 53 g/Kg   |
| Calcium Carbonate              | 13.1 g/Kg |
| Sodium Chloride                | 2.6 g/Kg  |
| AIN93 Trace Minerals           | 1.4 g/Kg  |
| Potassium Citrate              | 2.5 g/Kg  |
| Potassium Dihydrogen Phosphate | 6.9 g/Kg  |
| Potassium Sulphate             | 1.6 g/Kg  |
| Choline Chloride (75%)         | 2.5 g/Kg  |
| AIN93 Vitamins                 | 10 g/Kg   |

| Calculated Total Vitamins as Fed |             |
|----------------------------------|-------------|
| Vitamin A (Retinol)              | 4 000 IU/Kg |
| Vitamin D (Cholecalciferol)      | 1 000 IU/Kg |
| Vitamin E (a Tocopherol acetate) | 81 mg/Kg    |
| Vitamin K (Menadione)            | 1 mg/Kg     |
| Vitamin C (Ascorbic acid)        | None added  |
| Vitamin B1 (Thiamine)            | 6.0 mg/Kg   |
| Vitamin B2 (Riboflavin)          | 6.0 mg/Kg   |
| Niacin (Nicotinic acid)          | 30 mg/Kg    |
| Vitamin B6 (Pyridoxine)          | 7 mg/Kg     |
| Pantothenic Acid                 | 16 mg/Kg    |
| Biotin                           | 200 ug/Kg   |
| Folic Acid                       | 2 mg/Kg     |
| Inositol                         | None added  |
| Vitamin B12 (Cyanocobalamin)     | 101 ug/Kg   |
| Choline                          | 2 010 mg/Kg |

| Calculated Amino Acids as Fed |                     |               |
|-------------------------------|---------------------|---------------|
|                               | Recommended Minimum | Level in Diet |
| Valine                        | 0.74%               | 0.67%         |
| Leucine                       | 1.07%               | 1.30%         |
| Isoleucine                    | 0.62%               | 0.59%         |
| Threonine                     | 0.62%               | 0.78%         |
| Methionine*                   | 0.98%               | 0.48%         |
| Cysteine                      |                     | 0.15%         |
| Lysine                        | 0.92%               | 0.86%         |
| Phenylalanine°                | 1.02%               | 0.53%         |
| Tyrosine                      |                     | 0.51%         |
| Tryptophan                    | 0.20%               | 0.23%         |
| Alanine                       |                     | 0.60%         |
| Aspartic Acid                 |                     | 0.76%         |
| Glutamic Acid                 |                     | 1.18%         |
| Proline                       |                     | 0.87%         |
| Asparagine                    |                     | 0.38%         |
| Glutamine                     |                     | 0.84%         |
| Arginine                      | 0.48%               | 1.03%         |
| Glycine                       |                     | 0.47%         |
| Histidine                     | 0.28%               | 0.38%         |
| Serine                        |                     | 0.83%         |

\*One half of L-Methionine can be replaced with L-Cystine

°One Half of L-Phenylalanine can be replaced with L-Tyrosine

| Calculated Total Minerals as Fed |            | Calculated Fatty Acid Composition as Fed |         |
|----------------------------------|------------|------------------------------------------|---------|
| Calcium                          | 0.69%      | Saturated Fats C12:0 and less            | 0.02%   |
| Phosphorous                      | 0.24%      | Myristic Acid 14:0                       | 0.12%   |
| Magnesium                        | 0.06%      | Palmitic Acid 16:0                       | 3.50%   |
| Sodium                           | 0.14%      | Stearic Acid 18:0                        | 1.84%   |
| Chloride                         | 0.16%      | Palmitoleic Acid 16:1                    | 0.15%   |
| Potassium                        | 0.44%      | Oleic Acid 18:1                          | 6.13%   |
| Sulphur                          | 0.18%      | Gadoleic Acid 20:1                       | 0.08%   |
| Iron                             | 50 mg/Kg   | Linoleic Acid 18:2 n6                    | 8.95%   |
| Copper                           | 8.5 mg/Kg  | a Linolenic Acid 18:3 n3                 | 2.40%   |
| Iodine                           | 0.2 mg/Kg  | Arachadonic Acid 20:4 n6                 | No data |
| Manganese                        | 22 mg/Kg   | EPA 20:5 n3                              | No data |
| Cobalt                           | No data    | DHA 22:6 n3                              | No data |
| Zinc                             | 41 mg/Kg   | Total n3                                 | 2.41%   |
| Molybdenum                       | 0.15 mg/Kg | Total n6                                 | 8.96%   |
| Selenium                         | 0.3 mg/Kg  | Total Mono Unsaturated Fats              | 6.39%   |
| Cadmium                          | No data    | Total Polyunsaturated Fats               | 11.41%  |
| Chromium                         | 1.0 mg/Kg  | Total Saturated Fats                     | 5.57%   |
| Fluoride                         | 1.0 mg/Kg  |                                          |         |
| Lithium                          | 0.1 mg/Kg  |                                          |         |
| Boron                            | 1.3 mg/Kg  |                                          |         |
| Nickel                           | 0.5 mg/Kg  |                                          |         |
| Vanadium                         | 0.1 mg/Kg  |                                          |         |

Calculated data uses information from typical raw material composition. It could be expected that individual batches of diet will vary from this figure. **Diet post treatment by irradiation or autoclave could change these parameters.** We are happy to provide full calculated nutritional information for all of our products, however we would like to emphasise that these diets have been specifically designed for manufacture by Specialty Feeds.

**Diet  
SF19-080**

**Diet 5b: 21P 15F 64C Energy modification of  
AIN93G**

A semi-pure diet formulation for laboratory rats and mice based on AIN-93G. Some modifications have been made to the original formulation to suit locally available raw materials.

- An omega 3 to omega 6 fatty acid ratio has been set at 1:3.7. Lipids are from Soybean oil, lard and linseed oil.
- Protein is from a protein mix specified by customer made from Casein, Whey Protein Isolate and supplemented Leucine, Threonine, Methionine, Tyrosine, Phenylalanine, Tryptophan, Alanine, Aspartic Acid, Arginine, Glycine, Histidine and Serine.
- Net metabolisable energy has been set to 14.7 MJ/Kg
- Cellulose inclusion has been allowed to float to act as a filler
- See Calculated Nutritional Parameters for energy break down

**Calculated Nutritional Parameters**

|                                                                |              |
|----------------------------------------------------------------|--------------|
| Protein                                                        | 20.2%        |
| Total Fat                                                      | 6.0%         |
| Crude Fibre                                                    | 3.8%         |
| AD Fibre                                                       | 3.8%         |
| Total Carbohydrate                                             | 58.6%        |
| Net Metabolisable Energy                                       | 14.7 MJ / Kg |
| % Total calculated net metabolisable energy from lipids        | 15.0%        |
| % Total calculated net metabolisable energy from Carbohydrates | 64.0%        |
| % Total calculated net metabolisable energy from protein       | 21.0%        |

**Diet Form and Features**

- Semi pure diet. 12 mm diameter pellets.
- Pack size 5 Kg, vacuum packed in oxygen impermeable plastic bags, under nitrogen. Bags are packed into cardboard cartons to protect them during transit. Smaller pack quantity on request.
- Diet suitable for irradiation but not suitable for autoclave.
- Lead time 2 weeks for non-irradiation or 4 weeks for irradiation.



| Ingredients                    |           |
|--------------------------------|-----------|
| Protein Mix                    | 213 g/Kg  |
| Sucrose                        | 101 g/Kg  |
| Soybean Oil                    | 37 g/Kg   |
| Lard                           | 17.5 g/Kg |
| Linseed Oil                    | 5.4 g/Kg  |
| Cellulose                      | 41 g/Kg   |
| Wheat Starch                   | 410 g/Kg  |
| Dextrinised Starch             | 134 g/Kg  |
| Calcium Carbonate              | 13.1 g/Kg |
| Sodium Chloride                | 2.6 g/Kg  |
| AIN93 Trace Minerals           | 1.4 g/Kg  |
| Potassium Citrate              | 2.5 g/Kg  |
| Potassium Dihydrogen Phosphate | 6.9 g/Kg  |
| Potassium Sulphate             | 1.6 g/Kg  |
| Choline Chloride (75%)         | 2.5 g/Kg  |
| AIN93 Vitamins                 | 10 g/Kg   |

| Calculated Total Vitamins as Fed |             |
|----------------------------------|-------------|
| Vitamin A (Retinol)              | 4 000 IU/Kg |
| Vitamin D (Cholecalciferol)      | 1 000 IU/Kg |
| Vitamin E (a Tocopherol acetate) | 77 mg/Kg    |
| Vitamin K (Menadione)            | 1 mg/Kg     |
| Vitamin C (Ascorbic acid)        | None added  |
| Vitamin B1 (Thiamine)            | 6.0 mg/Kg   |
| Vitamin B2 (Riboflavin)          | 6.1 mg/Kg   |
| Niacin (Nicotinic acid)          | 30 mg/Kg    |
| Vitamin B6 (Pyridoxine)          | 7 mg/Kg     |
| Pantothenic Acid                 | 16 mg/Kg    |
| Biotin                           | 200 ug/Kg   |
| Folic Acid                       | 2 mg/Kg     |
| Inositol                         | None added  |
| Vitamin B12 (Cyanocobalamin)     | 101 ug/Kg   |
| Choline                          | 2 130 mg/Kg |

| Calculated Amino Acids as Fed |                     |               |
|-------------------------------|---------------------|---------------|
|                               | Recommended Minimum | Level in Diet |
| Valine                        | 0.74%               | 1.01%         |
| Leucine                       | 1.07%               | 1.95%         |
| Isoleucine                    | 0.62%               | 0.89%         |
| Threonine                     | 0.62%               | 1.17%         |
| Methionine*                   | 0.98%               | 0.72%         |
| Cysteine                      |                     | 0.22%         |
| Lysine                        | 0.92%               | 1.30%         |
| Phenylalanine°                | 1.02%               | 0.79%         |
| Tyrosine                      |                     | 0.77%         |
| Tryptophan                    | 0.20%               | 0.34%         |
| Alanine                       |                     | 0.90%         |
| Aspartic Acid                 |                     | 1.15%         |
| Glutamic Acid                 |                     | 1.77%         |
| Proline                       |                     | 1.31%         |
| Asparagine                    |                     | 0.57%         |
| Glutamine                     |                     | 1.25%         |
| Arginine                      | 0.48%               | 1.54%         |
| Glycine                       |                     | 0.70%         |
| Histidine                     | 0.28%               | 0.57%         |
| Serine                        |                     | 1.25%         |

\*One half of L-Methionine can be replaced with L-Cystine

°One Half of L-Phenylalanine can be replaced with L-Tyrosine

| Calculated Total Minerals as Fed |            | Calculated Fatty Acid Composition as Fed |         |
|----------------------------------|------------|------------------------------------------|---------|
| Calcium                          | 0.69%      | Saturated Fats C12:0 and less            | 0.01%   |
| Phosphorous                      | 0.28%      | Myristic Acid 14:0                       | 0.03%   |
| Magnesium                        | 0.06%      | Palmitic Acid 16:0                       | 0.88%   |
| Sodium                           | 0.15%      | Stearic Acid 18:0                        | 0.46%   |
| Chloride                         | 0.16%      | Palmitoleic Acid 16:1                    | 0.04%   |
| Potassium                        | 0.46%      | Oleic Acid 18:1                          | 1.53%   |
| Sulphur                          | 0.25%      | Gadoleic Acid 20:1                       | 0.02%   |
| Iron                             | 50 mg/Kg   | Linoleic Acid 18:2 n6                    | 2.24%   |
| Copper                           | 6.9 mg/Kg  | a Linolenic Acid 18:3 n3                 | 0.60%   |
| Iodine                           | 0.2 mg/Kg  | Arachadonic Acid 20:4 n6                 | No data |
| Manganese                        | 16 mg/Kg   | EPA 20:5 n3                              | No data |
| Cobalt                           | No data    | DHA 22:6 n3                              | No data |
| Zinc                             | 42 mg/Kg   | Total n3                                 | 0.60%   |
| Molybdenum                       | 0.15 mg/Kg | Total n6                                 | 2.24%   |
| Selenium                         | 0.3 mg/Kg  | Total Mono Unsaturated Fats              | 1.6%    |
| Cadmium                          | No data    | Total Polyunsaturated Fats               | 2.85%   |
| Chromium                         | 1.0 mg/Kg  | Total Saturated Fats                     | 1.39%   |
| Fluoride                         | 1.0 mg/Kg  |                                          |         |
| Lithium                          | 0.1 mg/Kg  |                                          |         |
| Boron                            | 2.1 mg/Kg  |                                          |         |
| Nickel                           | 0.5 mg/Kg  |                                          |         |
| Vanadium                         | 0.1 mg/Kg  |                                          |         |

Calculated data uses information from typical raw material composition. It could be expected that individual batches of diet will vary from this figure. **Diet post treatment by irradiation or autoclave could change these parameters.** We are happy to provide full calculated nutritional information for all of our products, however we would like to emphasise that these diets have been specifically designed for manufacture by Specialty Feeds.

**Diet  
SF19-081**

**Diet 6b: 21P 45F 34C Energy modification of  
AIN93G**

A semi-pure diet formulation for laboratory rats and mice based on AIN-93G. Some modifications have been made to the original formulation to suit locally available raw materials.

- An omega 3 to omega 6 fatty acid ratio has been set at 1:3.7. Lipids are from Soybean oil, lard and linseed oil.
- Protein is from a protein mix specified by customer made from Casein, Whey Protein Isolate and supplemented Leucine, Threonine, Methionine, Tyrosine, Phenylalanine, Tryptophan, Alanine, Aspartic Acid, Arginine, Glycine, Histidine and Serine.
- Net metabolisable energy has been set to 14.7 MJ/Kg
- Cellulose inclusion has been allowed to float to act as a filler
- See Calculated Nutritional Parameters for energy break down

**Calculated Nutritional Parameters**

|                                                                |              |
|----------------------------------------------------------------|--------------|
| Protein                                                        | 20.2%        |
| Total Fat                                                      | 18.0%        |
| Crude Fibre                                                    | 21.2%        |
| AD Fibre                                                       | 21.2%        |
| Total Carbohydrate                                             | 31.2%        |
| Net Metabolisable Energy                                       | 14.7 MJ / Kg |
| % Total calculated net metabolisable energy from lipids        | 45.0%        |
| % Total calculated net metabolisable energy from Carbohydrates | 34.0%        |
| % Total calculated net metabolisable energy from protein       | 21.0%        |

**Diet Form and Features**

- Semi pure diet. 12 mm diameter pellets.
- Pack size 1.5 Kg, vacuum packed in oxygen impermeable plastic bags, under nitrogen. Bags are packed into cardboard cartons to protect them during transit. Smaller pack quantity on request.
- Diet suitable for irradiation but not suitable for autoclave.
- Lead time 2 weeks for non-irradiation or 4 weeks for irradiation.

| Ingredients                    |           |
|--------------------------------|-----------|
| Protein Mix                    | 213 g/Kg  |
| Sucrose                        | 53 g/Kg   |
| Soybean Oil                    | 112 g/Kg  |
| Lard                           | 53 g/Kg   |
| Linseed Oil                    | 16 g/Kg   |
| Cellulose                      | 227 g/Kg  |
| Wheat Starch                   | 215 g/Kg  |
| Dextrinised Starch             | 70 g/Kg   |
| Calcium Carbonate              | 13.1 g/Kg |
| Sodium Chloride                | 2.6 g/Kg  |
| AIN93 Trace Minerals           | 1.4 g/Kg  |
| Potassium Citrate              | 2.5 g/Kg  |
| Potassium Dihydrogen Phosphate | 6.9 g/Kg  |
| Potassium Sulphate             | 1.6 g/Kg  |
| Choline Chloride (75%)         | 2.5 g/Kg  |
| AIN93 Vitamins                 | 10 g/Kg   |

| Calculated Total Vitamins as Fed |             |
|----------------------------------|-------------|
| Vitamin A (Retinol)              | 4 000 IU/Kg |
| Vitamin D (Cholecalciferol)      | 1 000 IU/Kg |
| Vitamin E (a Tocopherol acetate) | 80 mg/Kg    |
| Vitamin K (Menadione)            | 1 mg/Kg     |
| Vitamin C (Ascorbic acid)        | None added  |
| Vitamin B1 (Thiamine)            | 6.0 mg/Kg   |
| Vitamin B2 (Riboflavin)          | 6.1 mg/Kg   |
| Niacin (Nicotinic acid)          | 30 mg/Kg    |
| Vitamin B6 (Pyridoxine)          | 7 mg/Kg     |
| Pantothenic Acid                 | 16 mg/Kg    |
| Biotin                           | 200 ug/Kg   |
| Folic Acid                       | 2 mg/Kg     |
| Inositol                         | None added  |
| Vitamin B12 (Cyanocobalamin)     | 101 ug/Kg   |
| Choline                          | 2 040 mg/Kg |

| Calculated Amino Acids as Fed |                     |               |
|-------------------------------|---------------------|---------------|
|                               | Recommended Minimum | Level in Diet |
| Valine                        | 0.74%               | 1.01%         |
| Leucine                       | 1.07%               | 1.95%         |
| Isoleucine                    | 0.62%               | 0.89%         |
| Threonine                     | 0.62%               | 1.17%         |
| Methionine*                   | 0.98%               | 0.72%         |
| Cysteine                      |                     | 0.22%         |
| Lysine                        | 0.92%               | 1.30%         |
| Phenylalanine°                | 1.02%               | 0.79%         |
| Tyrosine                      |                     | 0.77%         |
| Tryptophan                    | 0.20%               | 0.34%         |
| Alanine                       |                     | 0.90%         |
| Aspartic Acid                 |                     | 1.15%         |
| Glutamic Acid                 |                     | 1.77%         |
| Proline                       |                     | 1.31%         |
| Asparagine                    |                     | 0.57%         |
| Glutamine                     |                     | 1.25%         |
| Arginine                      | 0.48%               | 1.54%         |
| Glycine                       |                     | 0.70%         |
| Histidine                     | 0.28%               | 0.57%         |
| Serine                        |                     | 1.25%         |

\*One half of L-Methionine can be replaced with L-Cystine

°One Half of L-Phenylalanine can be replaced with L-Tyrosine

| Calculated Total Minerals as Fed |            | Calculated Fatty Acid Composition as Fed |         |
|----------------------------------|------------|------------------------------------------|---------|
| Calcium                          | 0.69%      | Saturated Fats C12:0 and less            | 0.02%   |
| Phosphorous                      | 0.27%      | Myristic Acid 14:0                       | 0.09%   |
| Magnesium                        | 0.06%      | Palmitic Acid 16:0                       | 2.63%   |
| Sodium                           | 0.15%      | Stearic Acid 18:0                        | 1.38%   |
| Chloride                         | 0.16%      | Palmitoleic Acid 16:1                    | 0.11%   |
| Potassium                        | 0.46%      | Oleic Acid 18:1                          | 4.60%   |
| Sulphur                          | 0.24%      | Gadoleic Acid 20:1                       | 0.06%   |
| Iron                             | 50 mg/Kg   | Linoleic Acid 18:2 n6                    | 6.71%   |
| Copper                           | 8.0 mg/Kg  | a Linolenic Acid 18:3 n3                 | 1.80%   |
| Iodine                           | 0.2 mg/Kg  | Arachadonic Acid 20:4 n6                 | No data |
| Manganese                        | 20 mg/Kg   | EPA 20:5 n3                              | No data |
| Cobalt                           | No data    | DHA 22:6 n3                              | No data |
| Zinc                             | 42 mg/Kg   | Total n3                                 | 1.81%   |
| Molybdenum                       | 0.15 mg/Kg | Total n6                                 | 6.72%   |
| Selenium                         | 0.3 mg/Kg  | Total Mono Unsaturated Fats              | 4.79%   |
| Cadmium                          | No data    | Total Polyunsaturated Fats               | 8.55%   |
| Chromium                         | 1.0 mg/Kg  | Total Saturated Fats                     | 4.17%   |
| Fluoride                         | 1.0 mg/Kg  |                                          |         |
| Lithium                          | 0.1 mg/Kg  |                                          |         |
| Boron                            | 1.6 mg/Kg  |                                          |         |
| Nickel                           | 0.5 mg/Kg  |                                          |         |
| Vanadium                         | 0.1 mg/Kg  |                                          |         |

Calculated data uses information from typical raw material composition. It could be expected that individual batches of diet will vary from this figure. **Diet post treatment by irradiation or autoclave could change these parameters.** We are happy to provide full calculated nutritional information for all of our products, however we would like to emphasise that these diets have been specifically designed for manufacture by Specialty Feeds.

**Diet  
SF19-082**

**Diet 7b: 30P 30F 40C Energy modification of  
AIN93G**

A semi-pure diet formulation for laboratory rats and mice based on AIN-93G. Some modifications have been made to the original formulation to suit locally available raw materials.

- An omega 3 to omega 6 fatty acid ratio has been set at 1:3.7. Lipids are from Soybean oil, lard and linseed oil.
- Protein is from a protein mix specified by customer made from Casein, Whey Protein Isolate and supplemented Leucine, Threonine, Methionine, Tyrosine, Phenylalanine, Tryptophan, Alanine, Aspartic Acid, Arginine, Glycine, Histidine and Serine.
- Net metabolisable energy has been set to 14.7 MJ/Kg
- Cellulose inclusion has been allowed to float to act as a filler
- See Calculated Nutritional Parameters for energy break down

**Calculated Nutritional Parameters**

|                                                                |              |
|----------------------------------------------------------------|--------------|
| Protein                                                        | 28.9%        |
| Total Fat                                                      | 12.0%        |
| Crude Fibre                                                    | 12.6%        |
| AD Fibre                                                       | 12.6%        |
| Total Carbohydrate                                             | 36.7%        |
| Net Metabolisable Energy                                       | 14.7 MJ / Kg |
| % Total calculated net metabolisable energy from lipids        | 30.0%        |
| % Total calculated net metabolisable energy from Carbohydrates | 40.0%        |
| % Total calculated net metabolisable energy from protein       | 30.0%        |

**Diet Form and Features**

- Semi pure diet. 12 mm diameter pellets.
- Pack size 1.5 Kg, vacuum packed in oxygen impermeable plastic bags, under nitrogen. Bags are packed into cardboard cartons to protect them during transit. Smaller pack quantity on request.
- Diet suitable for irradiation but not suitable for autoclave.
- Lead time 2 weeks for non-irradiation or 4 weeks for irradiation.

| Ingredients                    |           |
|--------------------------------|-----------|
| Protein Mix                    | 305 g/Kg  |
| Sucrose                        | 63 g/Kg   |
| Soybean Oil                    | 75 g/Kg   |
| Lard                           | 35 g/Kg   |
| Linseed Oil                    | 11 g/Kg   |
| Cellulose                      | 135 g/Kg  |
| Wheat Starch                   | 254 g/Kg  |
| Dextrinised Starch             | 83 g/Kg   |
| Calcium Carbonate              | 13.1 g/Kg |
| Sodium Chloride                | 2.6 g/Kg  |
| AIN93 Trace Minerals           | 1.4 g/Kg  |
| Potassium Citrate              | 2.5 g/Kg  |
| Potassium Dihydrogen Phosphate | 6.9 g/Kg  |
| Potassium Sulphate             | 1.6 g/Kg  |
| Choline Chloride (75%)         | 2.5 g/Kg  |
| AIN93 Vitamins                 | 10 g/Kg   |

| Calculated Total Vitamins as Fed |             |
|----------------------------------|-------------|
| Vitamin A (Retinol)              | 4 000 IU/Kg |
| Vitamin D (Cholecalciferol)      | 1 000 IU/Kg |
| Vitamin E (a Tocopherol acetate) | 78 mg/Kg    |
| Vitamin K (Menadione)            | 1 mg/Kg     |
| Vitamin C (Ascorbic acid)        | None added  |
| Vitamin B1 (Thiamine)            | 6.0 mg/Kg   |
| Vitamin B2 (Riboflavin)          | 6.2 mg/Kg   |
| Niacin (Nicotinic acid)          | 30 mg/Kg    |
| Vitamin B6 (Pyridoxine)          | 7 mg/Kg     |
| Pantothenic Acid                 | 16 mg/Kg    |
| Biotin                           | 200 ug/Kg   |
| Folic Acid                       | 2 mg/Kg     |
| Inositol                         | None added  |
| Vitamin B12 (Cyanocobalamin)     | 102 ug/Kg   |
| Choline                          | 2 070 mg/Kg |

| Calculated Amino Acids as Fed |                     |               |
|-------------------------------|---------------------|---------------|
|                               | Recommended Minimum | Level in Diet |
| Valine                        | 0.74%               | 1.45%         |
| Leucine                       | 1.07%               | 2.79%         |
| Isoleucine                    | 0.62%               | 1.27%         |
| Threonine                     | 0.62%               | 1.68%         |
| Methionine*                   | 0.98%               | 1.02%         |
| Cysteine                      |                     | 0.33%         |
| Lysine                        | 0.92%               | 1.85%         |
| Phenylalanine°                | 1.02%               | 1.13%         |
| Tyrosine                      |                     | 1.10%         |
| Tryptophan                    | 0.20%               | 0.49%         |
| Alanine                       |                     | 1.29%         |
| Aspartic Acid                 |                     | 1.64%         |
| Glutamic Acid                 |                     | 2.53%         |
| Proline                       |                     | 1.87%         |
| Asparagine                    |                     | 0.82%         |
| Glutamine                     |                     | 1.79%         |
| Arginine                      | 0.48%               | 2.20%         |
| Glycine                       |                     | 1.00%         |
| Histidine                     | 0.28%               | 0.81%         |
| Serine                        |                     | 1.78%         |

\*One half of L-Methionine can be replaced with L-Cystine

°One Half of L-Phenylalanine can be replaced with L-Tyrosine

| Calculated Total Minerals as Fed |            | Calculated Fatty Acid Composition as Fed |         |
|----------------------------------|------------|------------------------------------------|---------|
| Calcium                          | 0.69%      | Saturated Fats C12:0 and less            | 0.01%   |
| Phosphorous                      | 0.30%      | Myristic Acid 14:0                       | 0.06%   |
| Magnesium                        | 0.06%      | Palmitic Acid 16:0                       | 1.75%   |
| Sodium                           | 0.15%      | Stearic Acid 18:0                        | 0.92%   |
| Chloride                         | 0.16%      | Palmitoleic Acid 16:1                    | 0.08%   |
| Potassium                        | 0.49%      | Oleic Acid 18:1                          | 3.06%   |
| Sulphur                          | 0.33%      | Gadoleic Acid 20:1                       | 0.04%   |
| Iron                             | 50 mg/Kg   | Linoleic Acid 18:2 n6                    | 4.48%   |
| Copper                           | 7.5 mg/Kg  | a Linolenic Acid 18:3 n3                 | 1.20%   |
| Iodine                           | 0.2 mg/Kg  | Arachadonic Acid 20:4 n6                 | No data |
| Manganese                        | 18 mg/Kg   | EPA 20:5 n3                              | No data |
| Cobalt                           | No data    | DHA 22:6 n3                              | No data |
| Zinc                             | 44 mg/Kg   | Total n3                                 | 1.21%   |
| Molybdenum                       | 0.15 mg/Kg | Total n6                                 | 4.48%   |
| Selenium                         | 0.4 mg/Kg  | Total Mono Unsaturated Fats              | 3.19%   |
| Cadmium                          | No data    | Total Polyunsaturated Fats               | 5.70%   |
| Chromium                         | 1.0 mg/Kg  | Total Saturated Fats                     | 2.78%   |
| Fluoride                         | 1.0 mg/Kg  |                                          |         |
| Lithium                          | 0.1 mg/Kg  |                                          |         |
| Boron                            | 1.9 mg/Kg  |                                          |         |
| Nickel                           | 0.5 mg/Kg  |                                          |         |
| Vanadium                         | 0.1 mg/Kg  |                                          |         |

Calculated data uses information from typical raw material composition. It could be expected that individual batches of diet will vary from this figure. **Diet post treatment by irradiation or autoclave could change these parameters.** We are happy to provide full calculated nutritional information for all of our products, however we would like to emphasise that these diets have been specifically designed for manufacture by Specialty Feeds.



**Diet  
SF19-083**

**Diet 8b: 35P 45F 20C Energy modification of  
AIN93G**

A semi-pure diet formulation for laboratory rats and mice based on AIN-93G. Some modifications have been made to the original formulation to suit locally available raw materials.

- An omega 3 to omega 6 fatty acid ratio has been set at 1:3.7. Lipids are from Soybean oil, lard and linseed oil.
- Protein is from a protein mix specified by customer made from Casein, Whey Protein Isolate and supplemented Leucine, Threonine, Methionine, Tyrosine, Phenylalanine, Tryptophan, Alanine, Aspartic Acid, Arginine, Glycine, Histidine and Serine.
- Net metabolisable energy has been set to 14.7 MJ/Kg
- Cellulose inclusion has been allowed to float to act as a filler
- See Calculated Nutritional Parameters for energy break down

**Calculated Nutritional Parameters**

|                                                                |              |
|----------------------------------------------------------------|--------------|
| Protein                                                        | 33.7%        |
| Total Fat                                                      | 18.0%        |
| Crude Fibre                                                    | 21.3%        |
| AD Fibre                                                       | 21.3%        |
| Total Carbohydrate                                             | 18.4%        |
| Net Metabolisable Energy                                       | 14.7 MJ / Kg |
| % Total calculated net metabolisable energy from lipids        | 45.0%        |
| % Total calculated net metabolisable energy from Carbohydrates | 20.0%        |
| % Total calculated net metabolisable energy from protein       | 35.0%        |

**Diet Form and Features**

- Semi pure diet. 12 mm diameter pellets.
- Pack size 1.5 Kg, vacuum packed in oxygen impermeable plastic bags, under nitrogen. Bags are packed into cardboard cartons to protect them during transit. Smaller pack quantity on request.
- Diet suitable for irradiation but not suitable for autoclave.
- Lead time 2 weeks for non-irradiation or 4 weeks for irradiation.

| Ingredients                    |           |
|--------------------------------|-----------|
| Protein Mix                    | 356 g/Kg  |
| Sucrose                        | 31 g/Kg   |
| Soybean Oil                    | 112 g/Kg  |
| Lard                           | 53 g/Kg   |
| Linseed Oil                    | 16 g/Kg   |
| Cellulose                      | 229 g/Kg  |
| Wheat Starch                   | 124 g/Kg  |
| Dextrinised Starch             | 83 g/Kg   |
| Calcium Carbonate              | 13.1 g/Kg |
| Sodium Chloride                | 2.6 g/Kg  |
| AIN93 Trace Minerals           | 1.4 g/Kg  |
| Potassium Citrate              | 2.5 g/Kg  |
| Potassium Dihydrogen Phosphate | 6.9 g/Kg  |
| Potassium Sulphate             | 1.6 g/Kg  |
| Choline Chloride (75%)         | 2.5 g/Kg  |
| AIN93 Vitamins                 | 10 g/Kg   |

| Calculated Total Vitamins as Fed |             |
|----------------------------------|-------------|
| Vitamin A (Retinol)              | 4 000 IU/Kg |
| Vitamin D (Cholecalciferol)      | 1 000 IU/Kg |
| Vitamin E (a Tocopherol acetate) | 80 mg/Kg    |
| Vitamin K (Menadione)            | 1 mg/Kg     |
| Vitamin C (Ascorbic acid)        | None added  |
| Vitamin B1 (Thiamine)            | 6.0 mg/Kg   |
| Vitamin B2 (Riboflavin)          | 6.2 mg/Kg   |
| Niacin (Nicotinic acid)          | 30 mg/Kg    |
| Vitamin B6 (Pyridoxine)          | 7 mg/Kg     |
| Pantothenic Acid                 | 16 mg/Kg    |
| Biotin                           | 200 ug/Kg   |
| Folic Acid                       | 2 mg/Kg     |
| Inositol                         | None added  |
| Vitamin B12 (Cyanocobalamin)     | 102 ug/Kg   |
| Choline                          | 2 020 mg/Kg |

| Calculated Amino Acids as Fed |                     |               |
|-------------------------------|---------------------|---------------|
|                               | Recommended Minimum | Level in Diet |
| Valine                        | 0.74%               | 1.69%         |
| Leucine                       | 1.07%               | 3.25%         |
| Isoleucine                    | 0.62%               | 1.48%         |
| Threonine                     | 0.62%               | 1.96%         |
| Methionine*                   | 0.98%               | 1.19%         |
| Cysteine                      |                     | 0.38%         |
| Lysine                        | 0.92%               | 2.16%         |
| Phenylalanine°                | 1.02%               | 1.32%         |
| Tyrosine                      |                     | 1.29%         |
| Tryptophan                    | 0.20%               | 0.57%         |
| Alanine                       |                     | 1.51%         |
| Aspartic Acid                 |                     | 1.91%         |
| Glutamic Acid                 |                     | 2.95%         |
| Proline                       |                     | 2.18%         |
| Asparagine                    |                     | 0.96%         |
| Glutamine                     |                     | 2.09%         |
| Arginine                      | 0.48%               | 2.56%         |
| Glycine                       |                     | 1.17%         |
| Histidine                     | 0.28%               | 0.95%         |
| Serine                        |                     | 2.08%         |

\*One half of L-Methionine can be replaced with L-Cystine

°One Half of L-Phenylalanine can be replaced with L-Tyrosine

| Calculated Total Minerals as Fed |            | Calculated Fatty Acid Composition as Fed |         |
|----------------------------------|------------|------------------------------------------|---------|
| Calcium                          | 0.70%      | Saturated Fats C12:0 and less            | 0.02%   |
| Phosphorous                      | 0.31%      | Myristic Acid 14:0                       | 0.09%   |
| Magnesium                        | 0.06%      | Palmitic Acid 16:0                       | 2.63%   |
| Sodium                           | 0.14%      | Stearic Acid 18:0                        | 1.38%   |
| Chloride                         | 0.16%      | Palmitoleic Acid 16:1                    | 0.11%   |
| Potassium                        | 0.50%      | Oleic Acid 18:1                          | 4.60%   |
| Sulphur                          | 0.37%      | Gadoleic Acid 20:1                       | 0.06%   |
| Iron                             | 50 mg/Kg   | Linoleic Acid 18:2 n6                    | 6.71%   |
| Copper                           | 8.0 mg/Kg  | a Linolenic Acid 18:3 n3                 | 1.80%   |
| Iodine                           | 0.2 mg/Kg  | Arachadonic Acid 20:4 n6                 | No data |
| Manganese                        | 20 mg/Kg   | EPA 20:5 n3                              | No data |
| Cobalt                           | No data    | DHA 22:6 n3                              | No data |
| Zinc                             | 44 mg/Kg   | Total n3                                 | 1.81%   |
| Molybdenum                       | 0.15 mg/Kg | Total n6                                 | 6.72%   |
| Selenium                         | 0.4 mg/Kg  | Total Mono Unsaturated Fats              | 4.79%   |
| Cadmium                          | No data    | Total Polyunsaturated Fats               | 8.55%   |
| Chromium                         | 1.0 mg/Kg  | Total Saturated Fats                     | 4.17%   |
| Fluoride                         | 1.0 mg/Kg  |                                          |         |
| Lithium                          | 0.1 mg/Kg  |                                          |         |
| Boron                            | 1.7 mg/Kg  |                                          |         |
| Nickel                           | 0.5 mg/Kg  |                                          |         |
| Vanadium                         | 0.1 mg/Kg  |                                          |         |

Calculated data uses information from typical raw material composition. It could be expected that individual batches of diet will vary from this figure. **Diet post treatment by irradiation or autoclave could change these parameters.** We are happy to provide full calculated nutritional information for all of our products, however we would like to emphasise that these diets have been specifically designed for manufacture by Specialty Feeds.

**Diet  
SF19-084**

**Diet 9b: 42P 15F 43C Energy modification of  
AIN93G**

A semi-pure diet formulation for laboratory rats and mice based on AIN-93G. Some modifications have been made to the original formulation to suit locally available raw materials.

- An omega 3 to omega 6 fatty acid ratio has been set at 1:3.7. Lipids are from Soybean oil, lard and linseed oil.
- Protein is from a protein mix specified by customer made from Casein, Whey Protein Isolate and supplemented Leucine, Threonine, Methionine, Tyrosine, Phenylalanine, Tryptophan, Alanine, Aspartic Acid, Arginine, Glycine, Histidine and Serine.
- Net metabolisable energy has been set to 14.7 MJ/Kg
- Cellulose inclusion has been allowed to float to act as a filler
- See Calculated Nutritional Parameters for energy break down

**Calculated Nutritional Parameters**

|                                                                |              |
|----------------------------------------------------------------|--------------|
| Protein                                                        | 40.4%        |
| Total Fat                                                      | 6.0%         |
| Crude Fibre                                                    | 3.9%         |
| AD Fibre                                                       | 3.9%         |
| Total Carbohydrate                                             | 39.5%        |
| Net Metabolisable Energy                                       | 14.7 MJ / Kg |
| % Total calculated net metabolisable energy from lipids        | 15.0%        |
| % Total calculated net metabolisable energy from Carbohydrates | 43.0%        |
| % Total calculated net metabolisable energy from protein       | 42.0%        |

**Diet Form and Features**

- Semi pure diet. 12 mm diameter pellets.
- Pack size 5 Kg, vacuum packed in oxygen impermeable plastic bags, under nitrogen. Bags are packed into cardboard cartons to protect them during transit. Smaller pack quantity on request.
- Diet suitable for irradiation but not suitable for autoclave.
- Lead time 2 weeks for non-irradiation or 4 weeks for irradiation.

| Ingredients                    |           |
|--------------------------------|-----------|
| Protein Mix                    | 427 g/Kg  |
| Sucrose                        | 68 g/Kg   |
| Soybean Oil                    | 37 g/Kg   |
| Lard                           | 17.5 g/Kg |
| Linseed Oil                    | 5.4 g/Kg  |
| Cellulose                      | 42 g/Kg   |
| Wheat Starch                   | 274 g/Kg  |
| Dextrinised Starch             | 89 g/Kg   |
| Calcium Carbonate              | 13.1 g/Kg |
| Sodium Chloride                | 2.6 g/Kg  |
| AIN93 Trace Minerals           | 1.4 g/Kg  |
| Potassium Citrate              | 2.5 g/Kg  |
| Potassium Dihydrogen Phosphate | 6.9 g/Kg  |
| Potassium Sulphate             | 1.6 g/Kg  |
| Choline Chloride (75%)         | 2.5 g/Kg  |
| AIN93 Vitamins                 | 10 g/Kg   |

| Calculated Total Vitamins as Fed |             |
|----------------------------------|-------------|
| Vitamin A (Retinol)              | 4 000 IU/Kg |
| Vitamin D (Cholecalciferol)      | 1 000 IU/Kg |
| Vitamin E (a Tocopherol acetate) | 77 mg/Kg    |
| Vitamin K (Menadione)            | 1 mg/Kg     |
| Vitamin C (Ascorbic acid)        | None added  |
| Vitamin B1 (Thiamine)            | 6.0 mg/Kg   |
| Vitamin B2 (Riboflavin)          | 6.3 mg/Kg   |
| Niacin (Nicotinic acid)          | 30 mg/Kg    |
| Vitamin B6 (Pyridoxine)          | 7 mg/Kg     |
| Pantothenic Acid                 | 16 mg/Kg    |
| Biotin                           | 200 ug/Kg   |
| Folic Acid                       | 2 mg/Kg     |
| Inositol                         | None added  |
| Vitamin B12 (Cyanocobalamin)     | 103 ug/Kg   |
| Choline                          | 2 100 mg/Kg |

| Calculated Amino Acids as Fed |                     |               |
|-------------------------------|---------------------|---------------|
|                               | Recommended Minimum | Level in Diet |
| Valine                        | 0.74%               | 2.02%         |
| Leucine                       | 1.07%               | 3.90%         |
| Isoleucine                    | 0.62%               | 1.78%         |
| Threonine                     | 0.62%               | 2.35%         |
| Methionine*                   | 0.98%               | 1.43%         |
| Cysteine                      |                     | 0.45%         |
| Lysine                        | 0.92%               | 2.59%         |
| Phenylalanine°                | 1.02%               | 1.58%         |
| Tyrosine                      |                     | 1.55%         |
| Tryptophan                    | 0.20%               | 0.69%         |
| Alanine                       |                     | 1.81%         |
| Aspartic Acid                 |                     | 1.29%         |
| Glutamic Acid                 |                     | 3.54%         |
| Proline                       |                     | 2.61%         |
| Asparagine                    |                     | 1.15%         |
| Glutamine                     |                     | 2.51%         |
| Arginine                      | 0.48%               | 3.07%         |
| Glycine                       |                     | 1.40%         |
| Histidine                     | 0.28%               | 1.14%         |
| Serine                        |                     | 2.49%         |

\*One half of L-Methionine can be replaced with L-Cystine

°One Half of L-Phenylalanine can be replaced with L-Tyrosine

| Calculated Total Minerals as Fed |            | Calculated Fatty Acid Composition as Fed |         |
|----------------------------------|------------|------------------------------------------|---------|
| Calcium                          | 0.70%      | Saturated Fats C12:0 and less            | 0.01%   |
| Phosphorous                      | 0.35%      | Myristic Acid 14:0                       | 0.03%   |
| Magnesium                        | 0.06%      | Palmitic Acid 16:0                       | 0.88%   |
| Sodium                           | 0.14%      | Stearic Acid 18:0                        | 0.46%   |
| Chloride                         | 0.16%      | Palmitoleic Acid 16:1                    | 0.04%   |
| Potassium                        | 0.53%      | Oleic Acid 18:1                          | 1.53%   |
| Sulphur                          | 0.44%      | Gadoleic Acid 20:1                       | 0.02%   |
| Iron                             | 50 mg/Kg   | Linoleic Acid 18:2 n6                    | 2.24%   |
| Copper                           | 6.9 mg/Kg  | a Linolenic Acid 18:3 n3                 | 0.60%   |
| Iodine                           | 0.2 mg/Kg  | Arachadonic Acid 20:4 n6                 | No data |
| Manganese                        | 16 mg/Kg   | EPA 20:5 n3                              | No data |
| Cobalt                           | No data    | DHA 22:6 n3                              | No data |
| Zinc                             | 45 mg/Kg   | Total n3                                 | 0.60%   |
| Molybdenum                       | 0.15 mg/Kg | Total n6                                 | 2.24%   |
| Selenium                         | 0.4 mg/Kg  | Total Mono Unsaturated Fats              | 1.60%   |
| Cadmium                          | No data    | Total Polyunsaturated Fats               | 2.85%   |
| Chromium                         | 1.0 mg/Kg  | Total Saturated Fats                     | 1.39%   |
| Fluoride                         | 1.0 mg/Kg  |                                          |         |
| Lithium                          | 0.1 mg/Kg  |                                          |         |
| Boron                            | 2.3 mg/Kg  |                                          |         |
| Nickel                           | 0.5 mg/Kg  |                                          |         |
| Vanadium                         | 0.1 mg/Kg  |                                          |         |

Calculated data uses information from typical raw material composition. It could be expected that individual batches of diet will vary from this figure. **Diet post treatment by irradiation or autoclave could change these parameters.** We are happy to provide full calculated nutritional information for all of our products, however we would like to emphasise that these diets have been specifically designed for manufacture by Specialty Feeds.

**Diet  
SF19-085**

**Diet 10b: 50P 30F 20C Energy modification of  
AIN93G**

A semi-pure diet formulation for laboratory rats and mice based on AIN-93G. Some modifications have been made to the original formulation to suit locally available raw materials.

- An omega 3 to omega 6 fatty acid ratio has been set at 1:3.7. Lipids are from Soybean oil, lard and linseed oil.
- Protein is from a protein mix specified by customer made from Casein, Whey Protein Isolate and supplemented Leucine, Threonine, Methionine, Tyrosine, Phenylalanine, Tryptophan, Alanine, Aspartic Acid, Arginine, Glycine, Histidine and Serine.
- Net metabolisable energy has been set to 14.7 MJ/Kg
- Cellulose inclusion has been allowed to float to act as a filler
- See Calculated Nutritional Parameters for energy break down

**Calculated Nutritional Parameters**

|                                                                |              |
|----------------------------------------------------------------|--------------|
| Protein                                                        | 48.1%        |
| Total Fat                                                      | 12.1%        |
| Crude Fibre                                                    | 12.7%        |
| AD Fibre                                                       | 12.7%        |
| Total Carbohydrate                                             | 18.5%        |
| Net Metabolisable Energy                                       | 14.7 MJ / Kg |
| % Total calculated net metabolisable energy from lipids        | 30.0%        |
| % Total calculated net metabolisable energy from Carbohydrates | 20.0%        |
| % Total calculated net metabolisable energy from protein       | 50.0%        |

**Diet Form and Features**

- Semi pure diet. 12 mm diameter pellets.
- Pack size 1.5 Kg, vacuum packed in oxygen impermeable plastic bags, under nitrogen. Bags are packed into cardboard cartons to protect them during transit. Smaller pack quantity on request.
- Diet suitable for irradiation but not suitable for autoclave.
- Lead time 2 weeks for non-irradiation or 4 weeks for irradiation.

| Ingredients                    |           |
|--------------------------------|-----------|
| Protein Mix                    | 508 g/Kg  |
| Sucrose                        | 31 g/Kg   |
| Soybean Oil                    | 75 g/Kg   |
| Lard                           | 35 g/Kg   |
| Linseed Oil                    | 11 g/Kg   |
| Cellulose                      | 136 g/Kg  |
| Wheat Starch                   | 124 g/Kg  |
| Dextrinised Starch             | 40 g/Kg   |
| Calcium Carbonate              | 13.1 g/Kg |
| Sodium Chloride                | 2.6 g/Kg  |
| AIN93 Trace Minerals           | 1.4 g/Kg  |
| Potassium Citrate              | 2.5 g/Kg  |
| Potassium Dihydrogen Phosphate | 6.9 g/Kg  |
| Potassium Sulphate             | 1.6 g/Kg  |
| Choline Chloride (75%)         | 2.5 g/Kg  |
| AIN93 Vitamins                 | 10 g/Kg   |

| Calculated Total Vitamins as Fed |             |
|----------------------------------|-------------|
| Vitamin A (Retinol)              | 4 000 IU/Kg |
| Vitamin D (Cholecalciferol)      | 1 000 IU/Kg |
| Vitamin E (a Tocopherol acetate) | 78 mg/Kg    |
| Vitamin K (Menadione)            | 1 mg/Kg     |
| Vitamin C (Ascorbic acid)        | None added  |
| Vitamin B1 (Thiamine)            | 6.0 mg/Kg   |
| Vitamin B2 (Riboflavin)          | 6.3 mg/Kg   |
| Niacin (Nicotinic acid)          | 30 mg/Kg    |
| Vitamin B6 (Pyridoxine)          | 7 mg/Kg     |
| Pantothenic Acid                 | 16.6 mg/Kg  |
| Biotin                           | 200 ug/Kg   |
| Folic Acid                       | 2 mg/Kg     |
| Inositol                         | None added  |
| Vitamin B12 (Cyanocobalamin)     | 103 ug/Kg   |
| Choline                          | 2 040 mg/Kg |

| Calculated Amino Acids as Fed |                     |               |
|-------------------------------|---------------------|---------------|
|                               | Recommended Minimum | Level in Diet |
| Valine                        | 0.74%               | 2.41%         |
| Leucine                       | 1.07%               | 4.65%         |
| Isoleucine                    | 0.62%               | 2.12%         |
| Threonine                     | 0.62%               | 2.78%         |
| Methionine*                   | 0.98%               | 1.70%         |
| Cysteine                      |                     | 0.54%         |
| Lysine                        | 0.92%               | 3.09%         |
| Phenylalanine°                | 1.02%               | 1.88%         |
| Tyrosine                      |                     | 1.84%         |
| Tryptophan                    | 0.20%               | 0.82%         |
| Alanine                       |                     | 2.15%         |
| Aspartic Acid                 |                     | 2.73%         |
| Glutamic Acid                 |                     | 4.21%         |
| Proline                       |                     | 3.11%         |
| Asparagine                    |                     | 1.37%         |
| Glutamine                     |                     | 2.98%         |
| Arginine                      | 0.48%               | 3.66%         |
| Glycine                       |                     | 1.66%         |
| Histidine                     | 0.28%               | 1.36%         |
| Serine                        |                     | 2.96%         |

\*One half of L-Methionine can be replaced with L-Cystine

°One Half of L-Phenylalanine can be replaced with L-Tyrosine



| Calculated Total Minerals as Fed |            | Calculated Fatty Acid Composition as Fed |         |
|----------------------------------|------------|------------------------------------------|---------|
| Calcium                          | 0.70%      | Saturated Fats C12:0 and less            | 0.01%   |
| Phosphorous                      | 0.37%      | Myristic Acid 14:0                       | 0.06%   |
| Magnesium                        | 0.06%      | Palmitic Acid 16:0                       | 1.75%   |
| Sodium                           | 0.15%      | Stearic Acid 18:0                        | 0.92%   |
| Chloride                         | 0.16%      | Palmitoleic Acid 16:1                    | 0.08%   |
| Potassium                        | 0.55%      | Oleic Acid 18:1                          | 3.06%   |
| Sulphur                          | 0.52%      | Gadoleic Acid 20:1                       | 0.04%   |
| Iron                             | 50 mg/Kg   | Linoleic Acid 18:2 n6                    | 4.48%   |
| Copper                           | 7.5 mg/Kg  | a Linolenic Acid 18:3 n3                 | 1.20%   |
| Iodine                           | 0.2 mg/Kg  | Arachadonic Acid 20:4 n6                 | No data |
| Manganese                        | 17 mg/Kg   | EPA 20:5 n3                              | No data |
| Cobalt                           | No data    | DHA 22:6 n3                              | No data |
| Zinc                             | 46 mg/Kg   | Total n3                                 | 1.21%   |
| Molybdenum                       | 0.15 mg/Kg | Total n6                                 | 4.48%   |
| Selenium                         | 0.5 mg/Kg  | Total Mono Unsaturated Fats              | 3.19%   |
| Cadmium                          | No data    | Total Polyunsaturated Fats               | 5.70%   |
| Chromium                         | 1.0 mg/Kg  | Total Saturated Fats                     | 2.78%   |
| Fluoride                         | 1.0 mg/Kg  |                                          |         |
| Lithium                          | 0.1 mg/Kg  |                                          |         |
| Boron                            | 2.1 mg/Kg  |                                          |         |
| Nickel                           | 0.5 mg/Kg  |                                          |         |
| Vanadium                         | 0.1 mg/Kg  |                                          |         |

Calculated data uses information from typical raw material composition. It could be expected that individual batches of diet will vary from this figure. **Diet post treatment by irradiation or autoclave could change these parameters.** We are happy to provide full calculated nutritional information for all of our products, however we would like to emphasise that these diets have been specifically designed for manufacture by Specialty Feeds.
