# Supplementary material for: Male reproductive traits are differentially affected by dietary macronutrient balance but unrelated to adiposity
Source: Springer Nature journal article supplement (doi:10.1038/s41467-023-38314-x), 2023-05-04
Supplement: MOESM3 [file 41467_2023_38314_MOESM3_ESM.pdf › 41467_2023_38314_MOESM3_ESM.pdf]

## **Description of Additional Supplementary Files**

File Name: Supplementary data 1

Description: AIC values and model summaries for all variables

File Name: Supplementary data 2

Description: Raw data for all measured variables
