# Supplementary material for: Male reproductive traits are differentially affected by dietary macronutrient balance but unrelated to adiposity
Source: Nat Commun. 2023 May 4;14:2566. doi: 10.1038/s41467-023-38314-x (PMC10160019; doi:10.1038/s41467-023-38314-x)
Supplement: Supplementary file 4 — Supplementary Data 1-2 [file 41467_2023_38314_MOESM4_ESM.xlsx]

## Sheet: Supp data 1
weight - at sacrifice
Model	AIC
1	710.74
2	687.46
3	649.43
4	644.64
5	651.02
Model 4 favoured by AIC.
Coef.	Estimate	Std. Error
p_P	60.4403	68.1845
p_C	-5.0067	10.1462
p_F	105.547	44.5745
cubic(p_P, p_C)	-110.889	82.8128
cubic(p_P, p_F)	69.4366	156.551
cubic(p_C, p_F)	285.165	108.358
p_P:p_C	-52.7701	125.353
p_P:p_F	-213.858	132.864
p_C:p_F	-119.725	88.3622
p_P:p_C:p_F	656.331	279.183
weight - at baseline
Model	AIC
1	532.06
2	535.25
3	539.81
4	547.43
5	541.81
Model 1 favoured by AIC.
Coef.	round(summary(model.AIC)$coef[, c(1:3)], 4)
Estimate	14.9492
Std. Error	0.2002
t value	74.6557
weight - change from baseline
Model	AIC
1	715.14
2	695.92
3	665.9
4	661.99
5	667.82
Model 4 favoured by AIC.
Coef.	Estimate	Std. Error
p_P	56.8477	73.2946
p_C	-26.1241	10.9066
p_F	92.4599	47.9152
cubic(p_P, p_C)	-102.945	89.0192
cubic(p_P, p_F)	29.8939	168.284
cubic(p_C, p_F)	314.761	116.479
p_P:p_C	-50.5555	134.747
p_P:p_F	-234.374	142.822
p_C:p_F	-105.219	94.9845
p_P:p_C:p_F	573.097	300.106
weight - average weekly gain
Model	AIC
1	45.41
2	21.19
3	-19.09
4	-27.15
5	-17.21
Model 4 favoured by AIC.
Coef.	Estimate	Std. Error
p_P	3.1647	4.1499
p_C	-1.7128	0.6175
p_F	6.3559	2.7129
cubic(p_P, p_C)	-6.5467	5.0402
cubic(p_P, p_F)	3.6625	9.528
cubic(p_C, p_F)	21.1133	6.5949
p_P:p_C	-2.5312	7.6292
p_P:p_F	-14.7964	8.0864
p_C:p_F	-7.5175	5.3779
p_P:p_C:p_F	38.4404	16.9917
fat mass
Model	AIC
1	577.43
2	570.97
3	565.68
4	565.16
5	567.53
Model 3 favoured by AIC.
Coef.	Estimate	Std. Error
p_P	-6.0339	7.0796
p_C	-0.0635	2.1101
p_F	-11.7825	4.5992
p_P:p_C	20.2806	13.7099
p_P:p_F	34.1833	16.4403
p_C:p_F	39.6503	15.2634
lean mass
Model	AIC
1	586.23
2	560.69
3	535.78
4	521.89
5	537.55
Model 4 favoured by AIC.
Coef.	Estimate	Std. Error
p_P	137.229	40.8846
p_C	8.9092	6.0838
p_F	31.3254	26.7276
cubic(p_P, p_C)	-204.336	49.6559
cubic(p_P, p_F)	-151.424	93.8706
cubic(p_C, p_F)	50.848	64.9733
p_P:p_C	-202.506	75.1636
p_P:p_F	-230.967	79.6678
p_C:p_F	-19.3235	52.9835
p_P:p_C:p_F	469.361	167.403
percentage fat
Model	AIC
1	821.5
2	814.86
3	814.01
4	814.22
5	815.93
Model 2 favoured by AIC.
Coef.	Estimate	Std. Error
p_P	11.9058	3.5811
p_C	17.946	2.167
p_F	4.5624	2.6703
average testis weight - absolute
Model	AIC
1	-737.5
2	-739.35
3	-736.64
4	-730.81
5	-734.65
Model 1 favoured by AIC.
Coef.	round(summary(model.AIC)$coef[, c(1:3)], 4)
Estimate	0.0976
Std. Error	0.001
t value	96.6403
average testis weight - relative
Model	AIC
1	-1469.29
2	-1479.25
3	-1507.09
4	-1504.58
5	-1505.23
Model 3 favoured by AIC.
Coef.	Estimate	Std. Error
p_P	0.0062	0.0013
p_C	0.0049	0.0004
p_F	0.0076	0.0008
p_P:p_C	-0.0078	0.0024
p_P:p_F	-0.0112	0.0029
p_C:p_F	-0.0119	0.0027
average seminal vesicle weight - absolute
Model	AIC
1	-489.64
2	-516.74
3	-525.84
4	-532.45
5	-523.84
Model 4 favoured by AIC.
Coef.	Estimate	Std. Error
p_P	0.9163	0.5054
p_C	-0.0797	0.0752
p_F	0.6185	0.3304
cubic(p_P, p_C)	-1.3127	0.6139
cubic(p_P, p_F)	-0.7931	1.1605
cubic(p_C, p_F)	1.8807	0.8032
p_P:p_C	-1.2274	0.9292
p_P:p_F	-2.1937	0.9849
p_C:p_F	-0.8262	0.655
p_P:p_C:p_F	3.9928	2.0695
average seminal vesicle weight - relative
Model	AIC
1	-1379.36
2	-1382.85
3	-1380.01
4	-1377.53
5	-1378.13
Model 2 favoured by AIC.
Coef.	Estimate	Std. Error
p_P	0.0058	0.0004
p_C	0.0046	0.0002
p_F	0.0044	0.0003
sperm concentration
Model	AIC
1	442.97
2	446.7
3	448.62
4	455.01
5	449.88
Model 1 favoured by AIC.
Coef.	round(summary(model.AIC)$coef[, c(1:3)], 4)
Estimate	44.9876
Std. Error	1.2219
t value	36.8181
sperm motility
Model	AIC
1	410.08
2	406.96
3	410.16
4	413.5
5	411.13
Model 2 favoured by AIC.
Coef.	Estimate	Std. Error
p_P	58.347	4.9428
p_C	61.8172	2.991
p_F	75.1576	3.6858
sperm morphology
Model	AIC
1	-190.77
2	-191
3	-193.3
4	-200.37
5	-193.01
Model 4 favoured by AIC.
Coef.	Estimate	Std. Error
p_P	-2.5399	1.1841
p_C	-0.2221	0.1762
p_F	1.1976	0.7741
cubic(p_P, p_C)	4.5387	1.4382
cubic(p_P, p_F)	5.04	2.7188
cubic(p_C, p_F)	3.8553	1.8818
p_P:p_C	5.7189	2.177
p_P:p_F	4.0136	2.3074
p_C:p_F	-0.5051	1.5346
p_P:p_C:p_F	-9.2023	4.8485
sperm viability
Model	AIC
1	443.75
2	442.28
3	445.81
4	447.18
5	447.7
Model 1 favoured by AIC.
Coef.	round(summary(model.AIC)$coef[, c(1:3)], 4)
Estimate	42.5267
Std. Error	1.2298
t value	34.5801
H2DCFDA - baseline
Model	AIC
1	1042.32
2	1046.14
3	1047.61
4	1052.97
5	1049.61
Model 1 favoured by AIC.
Coef.	round(summary(model.AIC)$coef[, c(1:3)], 4)
Estimate	10213.4
Std. Error	413.994
t value	24.6705
H2DCFDA - 1 hour
Model	AIC
1	1187.2
2	1190.2
3	1193.79
4	1201.62
5	1195.77
Model 1 favoured by AIC.
Coef.	round(summary(model.AIC)$coef[, c(1:3)], 4)
Estimate	13317.9
Std. Error	603.24
t value	22.0774
H2DCFDA - change from baseline
Model	AIC
1	930.83
2	933.85
3	939.25
4	946.23
5	941.23
Model 1 favoured by AIC.
Coef.	round(summary(model.AIC)$coef[, c(1:3)], 4)
Estimate	3550.8
Std. Error	366.302
t value	9.6936
Seminiferous tubule count
Model	AIC
1	314.22
2	312.06
3	310.47
4	299.92
5	297.26
Model 5 favoured by AIC.
Coef.	Estimate	Std. Error
p_P	-58.3844	19.2168
p_C	-5.0474	6.7228
p_F	-7.1012	13.4452
p_P:p_C	237.864	59.1283
p_P:p_F	301.736	83.6126
p_C:p_F	111.509	51.9795
p_P:p_C:p_F	-1018.84	260.549
Seminiferous epithelium vacuolation
Model	AIC
1	242.34
2	232.89
3	230.64
4	233.11
5	231.99
Model 3 favoured by AIC.
Coef.	Estimate	Std. Error
p_P	9.594	6.2806
p_C	-1.0168	1.872
p_F	7.4887	4.0802
p_P:p_C	9.5045	12.1627
p_P:p_F	-22.4568	14.5849
p_C:p_F	0.0051	13.5408
Johnsen score
Model	AIC
1	63.66
2	65.13
3	63.9
4	69.27
5	65.73
Model 1 favoured by AIC.
Coef.	round(summary(model.AIC)$coef[, c(1:3)], 4)
Estimate	8.9025
Std. Error	0.0518
t value	171.9
Seminiferous tubule diameter
Model	AIC
1	697.01
2	697.99
3	700.95
4	704.33
5	701.77
Model 1 favoured by AIC.
Coef.	round(summary(model.AIC)$coef[, c(1:3)], 4)
Estimate	559.758
Std. Error	10.1487
t value	55.1554
Seminiferous tubule area
Model	AIC
1	1401.12
2	1401.24
3	1402.44
4	1395.48
5	1393.27
Model 5 favoured by AIC.
Coef.	Estimate	Std. Error
p_P	749850	177938
p_C	278257	62250
p_F	462022	124496
p_P:p_C	-1.66786e+06	547500
p_P:p_F	-2.5809e+06	774212
p_C:p_F	-1.0535e+06	481305
p_P:p_C:p_F	7.94509e+06	2.41256e+06
Seminiferous tubule lumen diameter
Model	AIC
1	606.77
2	599.23
3	603.47
4	608.01
5	604.54
Model 2 favoured by AIC.
Coef.	Estimate	Std. Error
p_P	184.729	24.5381
p_C	122.884	14.8484
p_F	216.479	18.2976
Seminiferous tubule epithelium height
Model	AIC
1	551.91
2	551.17
3	551.86
4	550.78
5	553.76
Model 1 favoured by AIC.
Coef.	round(summary(model.AIC)$coef[, c(1:3)], 4)
Estimate	149.299
Std. Error	3.0288
t value	49.2927
serum testosterone
Model	AIC
1	390.27
2	391.65
3	395.31
4	401.08
5	396.19
Model 1 favoured by AIC.
Coef.	round(summary(model.AIC)$coef[, c(1:3)], 4)
Estimate	4.0347
Std. Error	0.7876
t value	5.123
serum DHT
Model	AIC
1	98.24
2	99.52
3	103.61
4	109.1
5	104.34
Model 1 favoured by AIC.
Coef.	round(summary(model.AIC)$coef[, c(1:3)], 4)
Estimate	0.407
Std. Error	0.0691
t value	5.8909
serum 3adiol
Model	AIC
1	33.81
2	36.13
3	38.67
4	45.75
5	39.95
Model 1 favoured by AIC.
Coef.	round(summary(model.AIC)$coef[, c(1:3)], 4)
Estimate	0.3165
Std. Error	0.0404
t value	7.8373
serum 3bdiol
Model	AIC
1	58.98
2	62.15
3	61.05
4	67.3
5	62.81
Model 1 favoured by AIC.
Coef.	round(summary(model.AIC)$coef[, c(1:3)], 4)
Estimate	0.4133
Std. Error	0.0656
t value	6.3029
HSD17B3 gene expression
Model	AIC
1	-17.76
2	-19.81
3	-14.7
4	-9.23
5	-13.26
Model 2 favoured by AIC.
Coef.	Estimate	Std. Error
p_P	1.203	0.1405
p_C	0.7438	0.0848
p_F	0.7987	0.1051
GPX1 gene expression
Model	AIC
1	64.22
2	60.6
3	62.69
4	69.83
5	64.68
Model 2 favoured by AIC.
Coef.	Estimate	Std. Error
p_P	1.8035	0.2788
p_C	0.7678	0.1682
p_F	0.9344	0.2072
GPX4 gene expression
Model	AIC
1	107.44
2	100.58
3	103.67
4	107.83
5	105.37
Model 2 favoured by AIC.
Coef.	Estimate	Std. Error
p_P	3.4614	0.4764
p_C	1.4016	0.2642
p_F	1.5301	0.3941
GSS gene expression
Model	AIC
1	56.68
2	52.35
3	52.1
4	51.45
5	50.4
Model 2 favoured by AIC.
Coef.	Estimate	Std. Error
p_P	0.8808	0.2635
p_C	1.3384	0.1589
p_F	1.9708	0.1954
STAR gene expression
Model	AIC
1	228.49
2	231.81
3	234.84
4	240.42
5	236.64
Model 1 favoured by AIC.
Coef.	round(summary(model.AIC)$coef[, c(1:3)], 4)
Estimate	5.3416
Std. Error	0.222
t value	24.0642
GSR gene expression
Model	AIC
1	57.24
2	60.99
3	62.51
4	69.19
5	64.49
Model 1 favoured by AIC.
Coef.	round(summary(model.AIC)$coef[, c(1:3)], 4)
Estimate	2.1169
Std. Error	0.0507
t value	41.7411
NFE2L2 gene expression
Model	AIC
1	-93.59
2	-92.47
3	-90.01
4	-84.64
5	-88.48
Model 1 favoured by AIC.
Coef.	round(summary(model.AIC)$coef[, c(1:3)], 4)
Estimate	0.4028
Std. Error	0.0137
t value	29.5058
ADH5 gene expression
Model	AIC
1	23.43
2	26.71
3	24.95
4	29.27
5	26.17
Model 1 favoured by AIC.
Coef.	round(summary(model.AIC)$coef[, c(1:3)], 4)
Estimate	1.8678
Std. Error	0.0379
t value	49.2899
SOD1 gene expression
Model	AIC
1	343.29
2	342.34
3	341.66
4	347.94
5	342.71
Model 1 favoured by AIC.
Coef.	round(summary(model.AIC)$coef[, c(1:3)], 4)
Estimate	30.6333
Std. Error	0.5972
t value	51.2984
SOD2 gene expression
Model	AIC
1	152.95
2	155.81
3	153.89
4	158.05
5	155.46
Model 1 favoured by AIC.
Coef.	round(summary(model.AIC)$coef[, c(1:3)], 4)
Estimate	4.3061
Std. Error	0.1533
t value	28.0883
SOD3 gene expression
Model	AIC
1	-310.25
2	-307.76
3	-309.28
4	-305.06
5	-308.3
Model 1 favoured by AIC.
Coef.	round(summary(model.AIC)$coef[, c(1:3)], 4)
Estimate	0.0181
Std. Error	0.0015
t value	12.1094
CAT gene expression
Model	AIC
1	-127.58
2	-127.42
3	-126.41
4	-119.37
5	-124.42
Model 1 favoured by AIC.
Coef.	round(summary(model.AIC)$coef[, c(1:3)], 4)
Estimate	0.363
Std. Error	0.0103
t value	35.2147
8-OHdG
Model	AIC
1	347.65
2	350.11
3	353.67
4	353.37
5	353.63
Model 1 favoured by AIC.
Coef.	round(summary(model.AIC)$coef[, c(1:3)], 4)
Estimate	21.3674
Std. Error	1.0743
t value	19.8896
Testis total antioxidant capacity
Model	AIC
1	-76.81
2	-78.9
3	-76.57
4	-71.38
5	-76.41
Model 2 favoured by AIC.
Coef.	Estimate	Std. Error
p_P	1.2648	0.0862
p_C	1.5237	0.0522
p_F	1.5597	0.0643
Sperm total antioxidant capacity
Model	AIC
1	176.51
2	174.7
3	171.44
4	175.24
5	171.54
Model 3 favoured by AIC.
Coef.	Estimate	Std. Error
p_P	12.8395	3.8351
p_C	8.0467	1.1431
p_F	5.3324	2.4915
p_P:p_C	-15.9137	7.4269
p_P:p_F	3.2719	8.9059
p_C:p_F	12.8773	8.2684
Total glutathione
Model	AIC
1	738.95
2	742.79
3	748.23
4	754.13
5	750.22
Model 1 favoured by AIC.
Coef.	round(summary(model.AIC)$coef[, c(1:3)], 4)
Estimate	355.964
Std. Error	14.3952
t value	24.728

## Sheet: Supp data 2
male	diet	Diet % Protein	Diet % Carbs	Diet % Fat	weight at sacrifice (g)	baseline weight (g)	weight - change from baseline (g)	average weekly gain (g)	fat mass (g)	lean mass (g)	free water (g)	total water (g)	fat mass (%)	average testis weight - absolute (g)	average testis weight - relative (g)	average seminal vesicle weight - absolute (g)	average seminal vesicle weight - relative (g)	sperm concentration (million sperm/mL)	sperm motility (%)	abnormal sperm morphology (%)	sperm viability (%)	h2dcfda baseline	h2dcfda 1 hour	h2dcfda change	Seminiferous tubule count	Seminiferous tubule vacuolation	Johnsen score	Seminiferous tubule diameter	Seminifeous tubule area	Seminiferous tubule lumen diameter	Seminiferous epithelium height	Testosterone (ng/ml)	DHT (ng/ml)	3adiol (ng/ml)	3bdiol (ng/ml)	HSD17B3	GPX1	GPX4	GSS	STAR	GSR	NFE2L2	ADH5	SOD1	SOD2	SOD3	CAT	8-OHdG (ng/mL)	Testes total antioxidant capacity (nmol/uL trolox equivalent)
1	1	7	33	60	25.3	12.9	12.4	0.775	1.47	21.93	0.29	19.18	5.95142	0.096	0.00379447	0.1095	0.00432806								19	5	8.75	502.056	159761	143.37	138.721					0.8885	1.086	1.319	1.309	3.643	1.797	0.2665	1.814	39.83	5.541	0.00326	0.3116
2	1	7	33	60	25	14.2	10.8	0.675	1.83	21.32	0	18.54	7.5	0.112	0.00448	0.113	0.00452								15	5	8.58333	609.655	205459	289.023	156.424					1.041	0.9863	1.667	1.533	7.175	2.559	0.4399	2.271	40.36	4.509	0.025	0.4762	14.985
3	1	7	33	60	24.7	12.5	12.2	0.7625	1.36	21.53	0.33	19.03	5.71429	0.081	0.00327935	0.084	0.00340081								18	5	9.16667	500.893	150601	148.697	139.68					0.7325	0.8881		2.475	6.589	2.454	0.4243	1.894	34.46	7.08	0.0217	0.3704	16.497
4	1	7	33	60	24.9	11.5	13.4	0.8375	2.04	21.31	0.23	18.6	8.60759	0.0925	0.00371486	0.1045	0.00419679								17	3	8.66667	578.099	186047	214.894	168.858					1.002	1.317		1.833	6.97	2.737	0.6449	1.927	42.73	4.007	0.00631	0.4435	42.1618
5	1	7	33	60	24.3	12.7	11.6	0.725	1.79	20.37	0.44	17.75	7.78261	0.0945	0.00388889	0.12	0.00493827								18	3	9.23529	513.678	157946	123.378	164.919					0.4859	0.6062		1.202	5.339	1.976	0.3025	1.838	30.65		0.0132	0.3996	18.4302
6	1	7	33	60	26.6	12.9	13.7	0.85625	1.69	22.11	0.28	19.44	6.81452	0.1005	0.00377819	0.1365	0.00513158								14	2	8.42857	636.321	219669	161.869	186.999					0.6675	0.6663		2.252	2.323	2.015	0.3572	1.532	25.88			0.2728	21.3859
1	2	7	78	15	27.2	12.3	14.9	0.93125	1.99	22.27	0.95	20.02	7.6834	0.084	0.00308823	0.1575	0.00579044								13	2	9.09091	562.399	149820	129.619	196.308					0.962	1.696	2.712	1.184	4.729	1.692	0.3913	1.812	32.73	4.44	0.0451	0.3303
2	2	7	78	15	25.2	12.4	12.8	0.8	2.41	20.69	0.45	18.06	9.95868	0.094	0.00373016	0.1165	0.00462302								16	1	8.46667	506.243	173741	146.153	171.656					0.8363	1.052	1.685	1.474	5.387	2.311	0.462	1.859	29.53	5.903	0.0247	0.3862	18.4914
3	2	7	78	15	23.7	12.6	11.1	0.69375	2.28	19.39	0.42	16.86	10.0885	0.1015	0.0042827	0.099	0.00417721								12	1	9.1	477.804	139826	137.075	150.681					0.5716	0.6958	1.437	1.234	4.346	2.603	0.4698	1.325	32.79	3.237	0.00656	0.4043	16.341
4	2	7	78	15	24.4	15.7	8.7	0.54375	2.31	19.7	0.23	17.01	9.91416	0.0945	0.00387295	0.1325	0.00543033								7	0	8.85714	963.605	184853	119.724	155.503					0.4645	0.5729	1.079	0.8937	3.742	1.672	0.2892	1.768	24.39	3.688	0.00928	0.2781	25.6646
5	2	7	78	15	32.4	13.9	18.5	1.15625	3.21	23.06	0.17	19.99	11.8889	0.099	0.00305556	0.1725	0.00532407								11	1	8.8	626.632	159132	137.686	152.922					0.7391	0.8158	1.784	1.182	4.704	2.109	0.3656	2.076	29.32	4.905	0.0275	0.3502	18.3055
6	2	7	78	15	22.1	13.9	8.2	0.5125	2.69	17.08	0.31	14.74	12.8708	0.0905	0.00409502	0.0575	0.00260181								13	1	9.1	510.156	165670	111.68	139.412					1.001	1.246	1.648	1.925	6.937		0.5509		33.98				35.5202
1	3	14	56	30	39.5	13.9	25.6	1.6	5.97	26.86	0.19	23.03	17.8209	0.0935	0.00236709	0.191	0.00483544								15	5	8.35714	531.969	171209	153.617	171.122					0.9121	1.683	2.578	1.579	2.173	1.42	0.2262	1.972	31.26	2.855	0.00759	0.2432
2	3	14	56	30	33	14.9	18.1	1.13125	1.08	29.2	0.13	25.15	3.47267	0.1035	0.00313636	0.169	0.00512121								15	3	9	585.563	157274	105.505	183.559					0.879	0.8348	2.07	1.943	6.801	2.503	0.3108	2.224	33.81	4.278	0.0235	0.3279	11.9096
3	3	14	56	30	34.8	14.3	20.5	1.28125	1.42	28.41	0.05	24.68	4.59547	0.0985	0.00283046	0.186	0.00534483								11	1	9.3	613.817	145987	137.15	163.028					0.9583	0.8475	2.714	1.962	6.013	2.464	0.3904	2.138	34.01	5.27	0.0284	0.3481	20.3236
4	3	14	56	30	39	13	26	1.625	4.17	29.97	0.3	25.76	11.5833	0.073	0.0018718	0.1175	0.00301282								15	5	9	653.659	202013	168.58	170.628					1.249	1.51	1.717	1.966	9.239	2.729	0.5993	2.58	33.12		0.00734	0.5604	22.8071
5	3	14	56	30	34.3	13.3	26.8	1.675	10.14	26.34	0.09	22.51	26.6142	0.108	0.00314869	0.1645	0.00479592								7	2	9.14286	561.438	178018	166.232	148.661					0.7054	0.6813	1.53	1.852	4.75	2.285	0.3261	2.046	26.87			0.3338	19.4544
6	3	14	56	30	33	11	22	1.375	3.75	25.8	0.3	22.13	12.1753	0.101	0.00306061	0.1715	0.00519697								9	3	9.2	667.296	166268	182.099	162.436					0.659	0.6782	1.649	1.803	5.83	2.025		1.819	27.9			0.3271
1	4	14	26	60	30.8	12.7	18.1	1.13125	0.82	28.57	0.19	24.84	2.68852	0.0935	0.00303571	0.165	0.00535714								20	5	9.11111	509.644	154824	151.285	154.498					1.048	1.342	1.931	1.524	5.056	1.953	0.3202	2.108	34.02	2.952	0.0253	0.3154	18.1365
2	4	14	26	60	28.7	12.8	15.9	0.99375	0.51	27.22	0.04	23.54	1.777	0.106	0.00369338	0.172	0.00599303								11	5	9.36364	679.103	242351	207.025	167.959					0.7151	1.02	1.56	1.877	4.36	1.987	0.3983	1.739	33.41	4.785	0.0237	0.3714	17.242
3	4	14	26	60	33	12	21	1.3125	1.33	28.31	0.23	24.41	4.26282	0.105	0.00318182	0.14	0.00424242								14	6	8.85714	488.529	164542	174.423	131.264					0.752	0.8786	1.734	1.249	6.586	2.64	0.4526	2.161	30.71	5.625	0.0281	0.4061	17.3326
4	4	14	26	60	28.6	15	13.6	0.85	2.26	24.07	0.07	21.21	8.21818	0.0885	0.00309441	0.141	0.00493007								13	1	9.53846	569.171	191389	169.659	157.2					0.4886	0.4552	1.528	0.8047	3.044	1.257	0.2575	1.07	21.14	2.895		0.2491	20.924
5	4	14	26	60	30.7	12.4	18.3	1.14375	2.79	24.72	0	21.53	9.55479	0.107	0.00348534	0.163	0.00530945								13	6	8.92308	514.989	169282	197.409	149.65					0.8645	1.023	1.491	1.64	6.076	1.889	0.3979	1.707	33.05	3.644		0.3539	16.0486
6	4	14	26	60	29.5	13.4	16.1	1.00625	2.45	24.05	0.12	20.8	8.90909	0.104	0.00352542	0.1555	0.00527119								15	2	7.53333	516.6	193202	279.786	72.7885					1.01	1.076		1.635	5.871	2.085	0.4497	1.996	31.02	4.463		0.4205	20.3844
1	5	21	64	15	28.5	12.2	16.3	1.01875	1.84	24.77	0.18	20.96	6.52482	0.0575	0.00201754	0.091	0.00319298								16	3	9.14286	508.176	133810	145.279	147.324					1.079	1.392	1.752	1.098	3.45	2.354	0.3816	2.265	33.35	3.05	0.00471	0.3582
2	5	21	64	15	33.2	12.8	20.5	1.28125	1.84	26.91	0.08	22.89	6.19529	0.1065	0.00320783	0.1585	0.0047741								14	4	9	536.448	162115	171.314	127.356					1.056	0.4148	0.7458	0.5921	5.157	1.249	0.1866	1.096	15.74	1.864	0.00437	0.1701	23.2366
3	5	21	64	15	30.3	13.1	17.2	1.075	0.99	25.36	1.14	23.09	3.42561	0.0985	0.00325083	0.1755	0.00579208								14	6	8.61538	564.879	165860	148.162	163.266					0.6582	0.6278	1.637	1.105	2.688	1.751	0.2967	1.594	30.78	3.806	0.00927	0.2655	16.5347
4	5	21	64	15	31.2	14.3	16.9	1.05625	0.79	28.55	0.12	24.4	2.59868	0.1005	0.00322115	0.1825	0.00584936								14	2	9.35714	487.41	155198	197.475	135.327					0.9823	1.189	1.509	1.455	5.73	2.204	0.4918	1.869	30.82	4.808	0.0327	0.4258	22.572
5	5	21	64	15	31.2	12.5	18.7	1.16875	0.94	29.09	0.08	24.72	3.05195	0.102	0.00326923	0.164	0.00525641								17	5	9	505.996	163678	164.143	123.491					0.687	0.7093	1.571	1.422	6.466	1.965	0.3206	1.637	28.21	3.266	0.0118	0.3372	16.5462
6	5	21	64	15	29.6	12.3	17.3	1.08125	1.07	27.48	0.3	23.63	3.60269	0.1055	0.00356419	0.16	0.00540541								16	1	9.15385	565.076	170642	157.202	156.254					0.7079	0.7087	1.502	1.16	5.525	1.856	0.2995	1.645	30.05		0.00809	0.292	16.9147
1	6	21	34	45	32	12.5	19.5	1.21875	0.31	29.93	0.17	26.06	0.984127	0.061	0.00190625	0.101	0.00315625								14	1	9.83333	497.959	172272	156.132	148.528					0.8873	2.044	3.328	0.9422	8.585	1.274	0.3139	1.615	32.17	2.184	0.0166	0.2172
2	6	21	34	45	29.2	12.2	17	1.0625	0.81	26.08	0.11	22.68	2.91367	0.1005	0.00344178	0.1395	0.0047774								14	5	9.33333	492.612	136076	168.544	133.883					1.047	1.01	1.573	1.159	10.12	1.899	0.4034	1.622	29.83	4.614	0.0103	0.3909	15.335
3	6	21	34	45	31.4	11.6	19.8	1.2375	0.25	27.66	0.19	24.25	0.859107	0.1015	0.00323248	0.1505	0.00479299								9	4	9.66667	597.35	204736	160.546	156.722					0.9015	0.8876	1.636	1.58	4.461	2.61	0.4172	2.378	37.22	4.047	0.0102	0.4343	20.4956
4	6	21	34	45	34.4	15.6	18.8	1.175	1.09	28.27	0.15	24.6	3.57377	0.1005	0.00292151	0.1695	0.00492733								15	5	9.41667	454.128	171747	159.913	145.126					0.8845	0.8299	1.584	1.404	4.525	2.373	0.412	1.796	29.29	4.135	0.0139	0.3424	18.1508
5	6	21	34	45	32.2	13.9	18.3	1.14375	1.19	27.97	0.07	24.21	3.91447	0.099	0.00307453	0.167	0.00518634								15	5	8.21429	517.686	183700	298.807	83.475					0.8904	0.7339	1.54	1.737	5.72	2.183	0.3578	1.612	27.17	4.905	0.0181	0.3596	23.6219
6	6	21	34	45	36.3	13.5	22.8	1.425	3.3	28.34	0.34	24.38	9.82143	0.1035	0.00285124	0.1645	0.00453168								14	5	8.90909	591.151	199116	190.476	145.085						1.113		1.663		2.072	0.4364	1.956	29.47			0.4148	15.4855
1	7	30	40	30	36.6	12.9	23.7	1.48125	3.55	28.74	0	24.73	10.7576	0.1115	0.00304645	0.182	0.00497268								7	2	9.28571	585.592	185193	136.659	172.615					0.8538	1.284	2.866	1.323	3.313	2.09	0.3214	1.807	30.15	3.67	0.0151	0.2842
2	7	30	40	30	34.4	12.7	21.7	1.35625	1.45	29.02	0.14	24.79	4.61783	0.1145	0.00332849	0.177	0.00514535								10	5	8.8	693.062	261731	188.795	167.218					0.7681	0.8945	1.246	1.084	5.679	1.937	0.3894	1.664	25.32	3.455	0.0164	0.3288	14.2966
3	7	30	40	30	32	12.6	19.4	1.2125	1.25	29.63	0.17	25.63	3.90625	0.1045	0.00326562	0.1765	0.00551562								13	2	9	661.908	222179	148.748	213.912					0.6506	0.7625	1.662	1.422	2.985	2.292	0.414	1.736	28.07	3.893	0.0149	0.3219	16.72
4	7	30	40	30	33.9	12.1	21.8	1.3625	3.17	29.14	0.13	25.13	9.49102	0.0575	0.00169616	0.1125	0.00331858								12	1	8.92308	503.877	180675	178.494	152.462					1.031	1.246	1.825	1.541	7.317	2.559	0.5558	2.061	29.11	5.326	0.021	0.4406	18.8754
5	7	30	40	30	33.3	13	20.2	1.2625	2.17	28.66	0.08	24.69	6.80251	0.115	0.00345345	0.1715	0.00515015								14	5	9	601.351	258278	209.501	167.019					0.7167	0.7343	1.534	1.702	6.715	2.023	0.3219	1.729	27.19	3.138	0.0148	0.3003	22.2153
6	7	30	40	30	32.8	13.9	18.9	1.18125	2.27	27.02	0.48	23.34	7.44262	0.089	0.00271341	0.1865	0.00568598								9	2	8.88889	539.59	171928	180.275	135.757																	16.5228
1	8	35	20	45	32	11.8	20.2	1.2625	5.45	24.89	0.34	21.19	17.5806	0.1045	0.00326562	0.16	0.005								20	2	8.23077	527.832	165692	191.013	135.239					1.178	2.072	3.242	1.832	2.629	1.602	0.4353	1.832	32.61	2.926	0.0268	0.3049
2	8	35	20	45	30.8	14.5	16.3	1.01875	4.05	23.32	0.14	20.09	14.1115	0.103	0.00334416	0.1675	0.00543831								15	5	8.86667	540.857	171413	196.492	140.614					1.073	1.263	2.335	2.216	7.46	2.004	0.466	2.006	31.95	5.456	0.0134	0.4397	18.0724
3	8	35	20	45	30.6	13.9	16.7	1.04375	4.63	24.4	0.38	20.61	16.0208	0.1095	0.00357843	0.148	0.0048366								19	3	8.73333	483.563	157427	118.505	157.223					0.7369	0.8351	2.322	1.024	5.038	2.037	0.302	1.806	31.07	4.272	0.00628	0.3097	18.8539
4	8	35	20	45	29.5	13.4	16.1	1.00625	0.42	27.89	0.08	24.02	1.42857	0.103	0.00349153	0.149	0.00505085								24	5	8.72222	454.802	142876	187.136	113.291					0.5818	0.6462	1.487	1.005	4.048	1.71	0.4611	1.356	24.92	3.305	0.0225	0.2833	37.4408
5	8	35	20	45	32.6	15.2	17.4	1.0875	0.54	29.26	0.44	25.2	1.73077	0.1075	0.00329755	0.175	0.0053681								15	5	9.375	511.139	156387	162.684	139.192					0.9596	1.044	1.635	1.904	5.293	2.552	0.3722	1.956	29.38	4.855	0.0331	0.4286	35.7186
6	8	35	20	45	30	14.1	15.9	0.99375	1.76	24.85	0.12	21.58	6.26335	0.102	0.0034	0.1585	0.00528333								13	1	9.41667	577.622	171277	155.749	155.497					0.9412	1.322	2.535		5.845	2.348		1.967	30.09	5.285		0.4116	21.5055
1	9	42	43	15	34.3	13.8	20.5	1.28125	2.82	27.93	0.03	23.83	8.92405	0.109	0.00317784	0.179	0.00521866								14	5	8.64286	534.213	187554	189.093	156.992					1.257	1.642	2.623	0.9023	2.783	1.694	0.3315	1.76	27.64	3.66	0.0114	0.3358
2	9	42	43	15	29.8	11.5	18.3	1.14375	0.99	27.36	0.19	23.63	3.37884	0.094	0.00315436	0.1625	0.00545302								14	5	8.66667	566.223	167393	141.863	144.891					0.6228	0.9582	2.409	1.25	5.217	2.228	0.3997	1.876	31.56	4.489	0.0186	0.358	16.045
3	9	42	43	15	37.5	13.5	24	1.5	4.64	28.38	0.38	24.54	13.7685	0.112	0.00298667	0.185	0.00493333								14	6	8.76923	616.342	215628	175.772	158.129					0.7664	1.042	2.342	1.072	4.757	2.064	0.6158	1.72	27.47	4.2	0.0117	0.3496	24.455
4	9	42	43	15	34.2	10.6	23.6	1.475	5.08	24.75	0.46	21.54	16.4935	0.0655	0.0019152	0.124	0.00362573								17	5	8.4375	498.568	163789	175.088	115.366					1.139	1.412	1.938	1.601	4.759	2.519	0.5096	2.121	33.55	6.17	0.0281	0.4892	38.7138
5	9	42	43	15	40.1	12.4	21.9	1.36875	6.1	24.42	0.57	20.9	19.2429	0.1085	0.00270574	0.1875	0.00467581								12	6	8.7	597.085	184564	161.093	141.021					0.9206	1.077	2.54	1.486	5.891	2.696	0.4447	2.102	25.43	5.523	0.0141	0.4674	47.7751
6	9	42	43	15	34.9	11.5	23.4	1.4625	6.2	24.3	0.01	20.71	19.4969	0.101	0.00289398	0.163	0.00467049								12	3	8.30769	567.727	185319	142.926	129.158					0.7882	0.8294		1.423	5.405	2.249		1.948	31.27	4.714	0.00841	0.3563	15.781
1	10	50	20	30	32.5	12.2	20.3	1.26875	2.73	27.78	0.36	24.07	8.53125	0.1025	0.00315385	0.1725	0.00530769								13	4	8.69231	613.503	221649	168.299	121.921					1.345	2.44	4.537	1.288	2.793	1.516	0.3043	1.898	35.68	3.123	0.0533	0.2352
2	10	50	20	30	39.1	13.8	25.3	1.58125	5.53	28.82	0.22	24.55	15.1507	0.111	0.00283887	0.2035	0.0052046								13	3	9.15385	508.257	180591	185.473	158.017					0.8883	1.381	2.183	1.488	6.372	2.303	0.4904	1.819	28.98	5.236	0.0294	0.4453	16.7819
3	10	50	20	30	35.6	13.4	22.2	1.3875	2	29.04	0.42	25.05	6.17284	0.103	0.00289326	0.17	0.00477528								15	5	8.71429	476.91	140975	201.259	107.716					0.9206	1.016	2.487	1.015	5.731	2.189	0.4117	1.934	39.8	5.69	0.0301	0.4202	20.6848
4	10	50	20	30	31.9	12.4	19.5	1.21875	0.57	30.29	0.42	26.46	1.82109	0.0785	0.00246081	0.1355	0.00424765								9	6	8.77778	628.567	207267	171.959	165.234					1.303	1.709	2.879	1.323	7.341	2.831	0.6523	2.529	29.55	5.354	0.00988	0.5062	20.0071
5	10	50	20	30	31.3	14.6	16.7	1.04375	0.66	29.13	0.39	25.07	2.12219	0.104	0.00332268	0.145	0.00463259								13	5	8.23077	562.775	210175	183.059	141.418					0.9811	1.218	1.627	1.245	7.23	2.338	0.5645	2.171	24.87	4.81	0.0242	0.4975	28.3578
6	10	50	20	30	28.1	12.7	15.4	0.9625	1.53	25.9	0.05	21.72	5.42553	0.0925	0.00329182	0.1555	0.00553381								13	5	8.6	535.932	177258	180.867	147.348					0.8042	1.218	1.58	1.13	5.103	2.05	0.3819	1.774			0.0136	0.4534	18.3065
7	1	7	33	60	22.7	15.3	7.1	0.507143	2.08	19.6	0.08	16.66	9.28571	0.0939	0.00413656	0.0905	0.00398678	55.125	80	25.5	47.5	8355	8953	598								0.89	0.0802	0.1174	0.1338														1.62529
8	1	7	33	60	24.7	17.7	6.5	0.464286	1.38	22.33	0.24	19.47	5.56452	0.09125	0.00369433	0.1275	0.00516194	47.9	70	20.5	59.7	9257.97	11554.4	2296.42								0.1448	0.116	0.0942	0.1184														1.66502
9	1	7	33	60	24.7	17.4	7.3	0.521429	2.55	21.41	0.09	18.56	10.241	0.09825	0.00397773	0.11495	0.00465385	44.2	75	15.5	46	8754.82	8619.32	-135.499								1.448	0.0878	0.1426	0.0926														1.59316
10	1	7	33	60	28.6	19.7	8.7	0.621429	2.74	24.92	0.51	22.22	9.44828	0.09035	0.00315909	0.08705	0.00304371	46.6	80	22.5	63.4	8026.69	12264.5	4237.82								0.214	0.1422	0.1068	not detected														1.36963
11	1	7	33	60	24.87	15	9.2	0.657143	1.45	22.31	0.21	19.33	5.84677	0.0849	0.00341375	0.1128	0.00453558	56.9	60	15.5	36	13415.1	14081.4	666.375								0.822	0.352	0.1522	0.0544														1.36919
12	1	7	33	60	23.3	15.2	7.8	0.557143	2.04	19.12	0.29	17.03	9.18919	0.0789	0.00338627	0.0619	0.00265665	48.3	65	17.5	44.3	8853.2	16000.9	7147.65								0.286	0.1954	0.0708	not detected														1.38211
7	2	7	78	15	28.7	18	10.5	0.75	4.6	21.88	0.28	18.97	16.7883	0.09565	0.00333275	0.1561	0.00543902	42.9	65	17	46.2	8599.45	11373.7	2774.21								0.354	0.155	0.0848	not detected														1.65137
8	2	7	78	15	28	17.3	9.9	0.707143	4.29	22.02	0.18	18.99	15.6569	0.0973	0.003475	0.1391	0.00496786	48.3	65	17.5	35.4	6987.94	11195.6	4207.63								20.2	0.84	0.666	1.112														1.45307
9	2	7	78	15	22.1	17.9	7.6	0.542857	2.05	20.24	0.18	17.55	8.87446	0.0883	0.00399548	0.06125	0.00277149	37.7	65	16	43.6		13655.7									0.1344	0.1006	0.1624	not detected														1.4807
10	2	7	78	15	25.9	17.6	7.8	0.557143	2.62	21.93	0.3	19.09	10.155	0.10785	0.00416409	0.1331	0.005139	44.3	65	12.5	38.6	9575.43	7816.92	-1758.51								13.38	3.28	0.972	0.894														1.56469
11	2	7	78	15	31.2	17.3	11.9	0.85	4.33	22.33	0.31	19.3	15.5755	0.09335	0.00299199	0.1653	0.00529808	32.6	55	14.5	49.7	9791.74	13013.1	3221.41								1.428	0.218	0.136	0.1494														1.47325
12	2	7	78	15	41	18.2	19.7	1.40714	11.82	23.23	0.1	19.99	32.6519	0.08845	0.00215732	0.18095	0.00441342	42.3	70	14	37.6	11877.7	16146.4	4268.64								0.1534	0.1248	0.606	not detected														1.25119
7	3	14	56	30	33.4	17.9	15.9	1.13571	8.12	23.73	0.08	20.34	24.7561	0.09915	0.00296856	0.1609	0.00481736	26.3	60	23	36.4	7939	8716	777								0.576	0.1986	0.1214	0.0914														1.43545
8	3	14	56	30	31	15.6	15.1	1.07857	5.66	22.78	0.34	19.64	19.1216	0.08395	0.00270806	0.13605	0.00438871	39.5	70	16.5	39.4	9661.06	11767.1	2106.07								1.414	0.42	0.1322	0.282														1.74724
9	3	14	56	30	42.8	18.1	22.5	1.60714	12.85	23.91	0.22	20.62	33.905	0.09105	0.00212734	0.154	0.00359813	42.2	70	17.5	52.5	8299.79	11270.6	2970.86								0.432	0.1522	0.0754	0.1012														1.60888
10	3	14	56	30	33.2	16	14.6	1.04286	5.68	24.26	0.37	20.96	18.0317	0.0897	0.00270181	0.1845	0.00555723	55.5	60	17.5	44.2	9882.29	13600.4	3718.12								3.04	2.18	0.266	0.4														1.48675
11	3	14	56	30	37.3	16.1	19.3	1.37857	9.48	24.15	0.16	20.51	27.3988	0.091	0.00243968	0.1835	0.00491957	42.6	65	24	44.5	8134.54	13111.3	4976.73								1.086	0.366	0.1736	0.1084														1.68797
12	3	14	56	30	30.7	16.6	13.6	0.971429	6.36	23.97	0.54	20.94	20.1266	0.09955	0.00324267	0.1814	0.00590879	47	65	9.5	21.6	17680.1	26103.7	8423.64								1.132	0.1346	0.236	0.137														1.55192
7	4	14	26	60	26.1	17.3	9.3	0.664286	2.65	24.08	0.21	20.95	9.46429	0.07895	0.0030249	0.1081	0.00414176	45.7	70	14.5	36.1	7579	11020	3441								18.46	1.148	0.736	0.838														1.68886
8	4	14	26	60	27.6	18.8	9.5	0.678571	3.5	24.16	0.32	21.57	12.1528	0.09485	0.00343659	0.13045	0.00472645	51.3	70	19	37.3	8813.14	13659.4	4846.31								0.316	0.0514	0.1104	0.082														1.53114
9	4	14	26	60	28.7	16.3	12.9	0.921429	4.58	24.11	0.25	21.03	15.3177	0.10405	0.00362544	0.13865	0.00483101	36.6	60	21	42	8336.19	10131	1794.85								7.94	0.262	0.556	0.592														1.42819
10	4	14	26	60	27	16.5	9.5	0.678571	3.15	22.27	0.12	19.23	11.9318	0.1072	0.00397037	0.1103	0.00408518	32.8	60	10	34	9258.64	9300	41.3647								3.66	0.232	0.47	0.924														1.42658
11	4	14	26	60	30.14	17.2	11.3	0.807143	4.74	24.24	0.2	21.11	15.6954	0.10265	0.00340577	0.17025	0.00564864	51	75	13.5	52.3	9946.79	13976.1	4029.31								0.294	0.202	0.1096	not detected														1.22272
12	4	14	26	60	26.4	16.3	10.3	0.735714	2.83	22.21	0.26	19.37	10.8015	0.1017	0.00385227	0.1413	0.00535227	59.5	65	13	48.3	11270.4	16374.4	5104								0.402	0.1836	0.1226	not detected														1.53842
7	5	21	64	15	36.3	16.4	18.5	1.32143	6.82	26.97	0.38	23.12	19.711	0.0833	0.00229477	0.1546	0.00425895	47.7	55	7.5	27.1	11425.4	12958.3	1532.95								0.406	0.0672	0.0572	0.0724														1.47172
8	5	21	64	15	34.7	17.2	16.3	1.16429	7.81	24.24	0.16	20.75	23.5952	0.10285	0.00296398	0.15395	0.0044366	44.6	55	7.5	29	6545.11	10085.7	3540.63								2.68	0.432	0.442	0.33														1.46015
9	5	21	64	15	43.4	17.5	22.1	1.57857	10.36	27.22	0.4	23.82	26.5641	0.112	0.00258064	0.20835	0.00480069	36.5	50	10.5	23.8	14674.9	23793.2	9118.33								0.434	0.468	0.123	0.1378														1.52458
10	5	21	64	15	30.3	17.9	12.2	0.871429	6.75	23.92	0.05	20.29	21.4968	0.0942	0.00310891	0.15555	0.00513366	54	65	11	46	10316	12069.4	1753.46								11.94	0.622	1.504	1.294														1.41968
11	5	21	64	15	33.5	17.8	15	1.07143	5.28	24.55	0.2	21.18	17.0323	0.1086	0.00324179	0.18435	0.00550299	71.3	65	3.22222	29	9444.91	13042.7	3597.82								1.296	0.0884	0.21	0.246														1.56997
12	5	21	64	15	36	18.6	15.1	1.07857	6.37	25.92	0.3	22.01	19.1291	0.1117	0.00310278	0.1815	0.00504167	40.9	65	16.5	40.5	13632.2	17562.9	3930.66								0.1684	0.1404	0.123	not detected														1.35642
7	6	21	34	45	31.61	16.2	12.8	0.914286	3.5	24.52	0.25	20.92	11.9863	0.1124	0.00355584	0.1426	0.00451123	37.4	70	11	47.3	8972.23	11399.1	2426.84								0.42	1.056	0.1484	0.286														1.64049
8	6	21	34	45	30.8	16.2	13.9	0.992857	3.86	24.71	0.37	21.66	12.8239	0.0986	0.0032013	0.16645	0.00540422	29.1	70	10.5	43.6	8243.77	10062.7	1818.92								10.66	0.384	0.304	0.434														1.55481
9	6	21	34	45	29.7	16.9	11.1	0.792857	3.56	23.91	0.14	20.66	12.4912	0.0884	0.00297643	0.13795	0.00464478	34.8	65	8.5	30.5	16216.6	25068.8	8852.24								7.7	1.068	1.016	0.982														1.65707
10	6	21	34	45	31.7	17.7	11.7	0.835714	4.62	25.19	0.25	21.89	14.9515	0.09315	0.00293849	0.15955	0.00503312	44.25	75	15	39.5	12013.9	7679.71	-4334.22								0.744	0.1226	0.1878	0.334														1.41366
11	6	21	34	45	32.8	17	14.8	1.05714	5.18	24.18	0.19	20.75	16.9836	0.08385	0.0025564	0.13375	0.00407774	61.8	65	17	41.8	13132.5	13688.4	555.943								0.382	0.296	0.1114	0.061														1.36582
12	6	21	34	45	31.1	14.9	13.9	0.992857	4.98	24.33	0.16	20.97	16.3816	0.08825	0.00283762	0.1568	0.0050418	48.8	75	12	48.8	16071.7	16336	264.331								0.248	0.0792	0.0854	not detected														1.47149
7	7	30	40	30	39.8	14.1	23.9	1.70714	7.14	27.53	0.24	23.65	19.9441	0.10155	0.00255151	0.1823	0.0045804	59	60	22	42.5	5977.24	12014.9	6037.64								2.32	0.352	0.1616	0.232														1.41783
8	7	30	40	30	40.1	16.9	21.3	1.52143	10.12	23.85	0.39	20.77	28.6686	0.0971	0.00242145	0.1643	0.00409726	32.6	70	19.5	54.3	7220.98	12725.3	5504.37								1.546	0.22	0.1974	0.1238														1.52873
9	7	30	40	30	37.67	16.2	18.8	1.34286	9.23	23.16	0.23	19.79	27.2271	0.0964	0.00255907	0.1539	0.00408548	43.2	65	14.5	40.7		13344.9									0.214	0.0828	0.0774	not detected														1.56258
10	7	30	40	30	45	17.9	21.2	1.51429	10.17	25.34	0.28	21.55	27.561	0.10195	0.00226556	0.16675	0.00370556	44	70	10.5	46.6	10942	11451.6	509.636								13.66	1.118	1.158	0.55														1.31988
11	7	30	40	30	35.86	17.6	15.4	1.1	6.61	24.35	0.31	20.89	20.528	0.1049	0.00292526	0.1611	0.00449247	50.5	75	14.5	43.7	7364.88	8695.75	1330.87								0.82	0.296	0.1072	0.123														1.44962
12	7	30	40	30	33.3	16.1	16.1	1.15	5.6	23.75	0.13	20.35	18.241	0.10635	0.00319369	0.1666	0.005003	35.9	60	12.5	23.9	20840.7	28923.1	8082.39								1.286	0.216	0.185	0.0908														1.33456
7	8	35	20	45	30.5	16	13.3	0.95	4.05	24.16	0.11	20.61	13.7288	0.09245	0.00303115	0.16025	0.0052541	47.6	75	23.5	43.4	7064	9136	2072								5.84	0.1272	0.46	0.558														1.54445
8	8	35	20	45	27.7	13.7	14.1	1.00714	2.27	23.93	0.38	20.86	8.25455	0.0938	0.00338628	0.1564	0.00564621	43.3	75	18.5	43.5	7366.68	12487.8	5121.15								0.202	0.208	0.1648	not detected														1.37447
9	8	35	20	45	34.5	19.3	13.6	0.971429	7.35	23.23	0.11	19.89	23.1861	0.10565	0.00306232	0.1819	0.00527246	46.2	55	25.5	66.5	10016.8	9093.57	-923.21								0.57	0.116	0.1542	0.0754														1.62183
10	8	35	20	45	34.3	15.8	16.2	1.15714	3.38	26.2	0.17	22.34	10.8333	0.10355	0.00301895	0.15365	0.00447959	19.58	50	13.5	37.3	13383	10623.7	-2759.33								5.48	0.208	0.574	0.364														1.45652
11	8	35	20	45	35.17	15.8	16.1	1.15	2.36	27.87	0.49	24.47	7.375	0.10415	0.00296133	0.16135	0.00458772	61	70	17	52.6	10406.8	15511.3	5104.47								13.54	0.1796	0.626	2.16														1.46885
12	8	35	20	45	30.3	15.7	13.4	0.957143	2.02	25.96	0.2	22.1	6.87075	0.1057	0.00348845	0.14175	0.00467822	51.4	60	12.5	45	13664.5	16800.1	3135.65								0.666	0.1822	0.176	0.088														1.44111
7	9	42	43	15	28.7	17.1	12	0.857143	2.62	24.49	0.12	20.72	9.25795	0.1059	0.00368989	0.14595	0.00508537	42.6	55	18	46.7	8225	11271	3046								13.92	0.65	0.722	1.178														1.3489
8	9	42	43	15	26.4	15.2	11.4	0.814286	1.37	24.28	0.18	20.88	5	0.10485	0.00397159	0.1207	0.00457197	38.3	75	21	65.9	7782.46	10316.7	2534.22								1.432	0.086	0.21	0.0926														1.27653
9	9	42	43	15	32.2	16.5	15.3	1.09286	5.8	25.06	0.24	21.78	18.0685	0.08955	0.00278106	0.1376	0.00427329	48.5	65	21	45.5		10548.8									22.8	0.704	0.558	1.006														1.55101
10	9	42	43	15	29.1	15.2	11.5	0.821429	2.28	22.6	0.17	19.36	8.73563	0.0899	0.00308935	0.147	0.00505155	53.4	70	9.5	41.4	10942	11823.8	881.752								1.978	0.226	0.1738	0.189														1.36303
11	9	42	43	15	29.4	17.2	12.5	0.892857	4.2	24.26	0.33	21.01	14.0468	0.087	0.00295918	0.17415	0.00592347	43.2	65	17.5	40.8	10410.4	14581.4	4170.99								1.564	0.334	0.1858	0.1106														1.44625
12	9	42	43	15	35.2	17.4	18.4	1.31429	7.02	24.84	0.19	21.31	21.018	0.09985	0.00283665	0.2079	0.00590625	58.1	60	14	21.4	16103.8	28105.6	12001.7								0.486	0.252	0.1454	0.0558														1.42174
7	10	50	20	30	33.5	16.2	17.3	1.23571	5.96	23.65	0.26	20.36	19.164	0.10255	0.00306119	0.1749	0.0052209	41.6	70	15.5	41.9	7546	8755	1209								17.8	0.528	0.97	0.656														1.60283
8	10	50	20	30	35.2	16	17.9	1.27857	4.92	24.31	0.2	20.98	15.8199	0.0962	0.00273296	0.17305	0.00491619	56.3	50	13	42.3	8911.88	11607.3	2695.45								18.32	1.18	0.574	0.9														1.50057
9	10	50	20	30	29.5	17.8	11.1	0.792857	3.29	22.88	0.31	19.96	11.7921	0.11045	0.00374407	0.18615	0.00631017	45.8	60	18.5	46.4	8972.23	9321.09	348.858								1.356	0.202	0.1934	0.1942														1.16401
10	10	50	20	30	33.4	18.1	14.5	1.03571	2.62	27.89	0.35	24.28	8.11146	0.10865	0.00325299	0.23825	0.00713323	33.1	70	22	51.3	7612.71	14247.1	6634.38								0.288	0.638	0.266	not detected														1.46474
11	10	50	20	30	35.85	16.7	16	1.14286	2.77	26.75	0.41	23.19	8.87821	0.10225	0.00285216	0.13945	0.00388982	44.3	60	15.5	42.2		14401.1									0.398	0.1392	0.0644	not detected														1.34688
12	10	50	20	30	31	16.6	14.1	1.00714	1.95	25.66	0.16	21.54	6.72414	0.1081	0.0034871	0.1665	0.00537097	31.5	70	21.5	42.3		15837.5									0.308	0.1116	0.138	not detected														1.27746
[truncated: 1 more columns]
