# Supplementary material for: Male reproductive traits are differentially affected by dietary macronutrient balance but unrelated to adiposity
Source: Nat Commun. 2023 May 4;14:2566. doi: 10.1038/s41467-023-38314-x (PMC10160019; doi:10.1038/s41467-023-38314-x)
Supplement: Supplementary file 6 — Source Data [file 41467_2023_38314_MOESM6_ESM.xlsx]

## Sheet: Figure 1
male	diet	Diet % Protein	Diet % Carbs	Diet % Fat	weight at sacrifice (g)	lean mass (g)	fat mass (%)	food intake (g)
1	1	7	33	60	25.3	21.93	5.95142	3.2
2	1	7	33	60	25	21.32	7.5	2.95
3	1	7	33	60	24.7	21.53	5.71429	3.6
4	1	7	33	60	24.9	21.31	8.60759	3.85
5	1	7	33	60	24.3	20.37	7.78261	3.4
6	1	7	33	60	26.6	22.11	6.81452	3.85
1	2	7	78	15	27.2	22.27	7.6834	3.35
2	2	7	78	15	25.2	20.69	9.95868	3.95
3	2	7	78	15	23.7	19.39	10.0885	2.95
4	2	7	78	15	24.4	19.7	9.91416	3.65
5	2	7	78	15	32.4	23.06	11.8889	3.1
6	2	7	78	15	22.1	17.08	12.8708	3.5
1	3	14	56	30	39.5	26.86	17.8209	2.55
2	3	14	56	30	33	29.2	3.47267	2.75
3	3	14	56	30	34.8	28.41	4.59547	3.3
4	3	14	56	30	39	29.97	11.5833	1.95
5	3	14	56	30	34.3	26.34	26.6142	2.65
6	3	14	56	30	33	25.8	12.1753	2.75
1	4	14	26	60	30.8	28.57	2.68852	2.6
2	4	14	26	60	28.7	27.22	1.777	2.7
3	4	14	26	60	33	28.31	4.26282	2.5
4	4	14	26	60	28.6	24.07	8.21818	3.25
5	4	14	26	60	30.7	24.72	9.55479	2.4
6	4	14	26	60	29.5	24.05	8.90909	2.3
1	5	21	64	15	28.5	24.77	6.52482	3.35
2	5	21	64	15	33.2	26.91	6.19529	3.05
3	5	21	64	15	30.3	25.36	3.42561	3.05
4	5	21	64	15	31.2	28.55	2.59868	2.55
5	5	21	64	15	31.2	29.09	3.05195	3.1
6	5	21	64	15	29.6	27.48	3.60269	2.2
1	6	21	34	45	32	29.93	0.984127	2.1
2	6	21	34	45	29.2	26.08	2.91367	2.25
3	6	21	34	45	31.4	27.66	0.859107	1.75
4	6	21	34	45	34.4	28.27	3.57377	2.2
5	6	21	34	45	32.2	27.97	3.91447	2.25
6	6	21	34	45	36.3	28.34	9.82143	2.1
1	7	30	40	30	36.6	28.74	10.7576	2.3
2	7	30	40	30	34.4	29.02	4.61783	2.6
3	7	30	40	30	32	29.63	3.90625	2.75
4	7	30	40	30	33.9	29.14	9.49102	2.1
5	7	30	40	30	33.3	28.66	6.80251	2.4
6	7	30	40	30	32.8	27.02	7.44262	2.25
1	8	35	20	45	32	24.89	17.5806	2.45
2	8	35	20	45	30.8	23.32	14.1115	2.15
3	8	35	20	45	30.6	24.4	16.0208	2.05
4	8	35	20	45	29.5	27.89	1.42857	2.65
5	8	35	20	45	32.6	29.26	1.73077	2.5
6	8	35	20	45	30	24.85	6.26335	2.75
1	9	42	43	15	34.3	27.93	8.92405	2.6
2	9	42	43	15	29.8	27.36	3.37884	2.8
3	9	42	43	15	37.5	28.38	13.7685	2.45
4	9	42	43	15	34.2	24.75	16.4935	2.55
5	9	42	43	15	40.1	24.42	19.2429	2.4
6	9	42	43	15	34.9	24.3	19.4969	2.6
1	10	50	20	30	32.5	27.78	8.53125	2.1
2	10	50	20	30	39.1	28.82	15.1507	2.7
3	10	50	20	30	35.6	29.04	6.17284	2.25
4	10	50	20	30	31.9	30.29	1.82109	3.1
5	10	50	20	30	31.3	29.13	2.12219	3.2
6	10	50	20	30	28.1	25.9	5.42553	2.65
7	1	7	33	60	22.7	19.6	9.28571
8	1	7	33	60	24.7	22.33	5.56452
9	1	7	33	60	24.7	21.41	10.241
10	1	7	33	60	28.6	24.92	9.44828
11	1	7	33	60	24.87	22.31	5.84677
12	1	7	33	60	23.3	19.12	9.18919
7	2	7	78	15	28.7	21.88	16.7883
8	2	7	78	15	28	22.02	15.6569
9	2	7	78	15	22.1	20.24	8.87446
10	2	7	78	15	25.9	21.93	10.155
11	2	7	78	15	31.2	22.33	15.5755
12	2	7	78	15	41	23.23	32.6519
7	3	14	56	30	33.4	23.73	24.7561
8	3	14	56	30	31	22.78	19.1216
9	3	14	56	30	42.8	23.91	33.905
10	3	14	56	30	33.2	24.26	18.0317
11	3	14	56	30	37.3	24.15	27.3988
12	3	14	56	30	30.7	23.97	20.1266
7	4	14	26	60	26.1	24.08	9.46429
8	4	14	26	60	27.6	24.16	12.1528
9	4	14	26	60	28.7	24.11	15.3177
10	4	14	26	60	27	22.27	11.9318
11	4	14	26	60	30.14	24.24	15.6954
12	4	14	26	60	26.4	22.21	10.8015
7	5	21	64	15	36.3	26.97	19.711
8	5	21	64	15	34.7	24.24	23.5952
9	5	21	64	15	43.4	27.22	26.5641
10	5	21	64	15	30.3	23.92	21.4968
11	5	21	64	15	33.5	24.55	17.0323
12	5	21	64	15	36	25.92	19.1291
7	6	21	34	45	31.61	24.52	11.9863
8	6	21	34	45	30.8	24.71	12.8239
9	6	21	34	45	29.7	23.91	12.4912
10	6	21	34	45	31.7	25.19	14.9515
11	6	21	34	45	32.8	24.18	16.9836
12	6	21	34	45	31.1	24.33	16.3816
7	7	30	40	30	39.8	27.53	19.9441
8	7	30	40	30	40.1	23.85	28.6686
9	7	30	40	30	37.67	23.16	27.2271
10	7	30	40	30	45	25.34	27.561
11	7	30	40	30	35.86	24.35	20.528
12	7	30	40	30	33.3	23.75	18.241
7	8	35	20	45	30.5	24.16	13.7288
8	8	35	20	45	27.7	23.93	8.25455
9	8	35	20	45	34.5	23.23	23.1861
10	8	35	20	45	34.3	26.2	10.8333
11	8	35	20	45	35.17	27.87	7.375
12	8	35	20	45	30.3	25.96	6.87075
7	9	42	43	15	28.7	24.49	9.25795
8	9	42	43	15	26.4	24.28	5
9	9	42	43	15	32.2	25.06	18.0685
10	9	42	43	15	29.1	22.6	8.73563
11	9	42	43	15	29.4	24.26	14.0468
12	9	42	43	15	35.2	24.84	21.018
7	10	50	20	30	33.5	23.65	19.164
8	10	50	20	30	35.2	24.31	15.8199
9	10	50	20	30	29.5	22.88	11.7921
10	10	50	20	30	33.4	27.89	8.11146
11	10	50	20	30	35.85	26.75	8.87821
12	10	50	20	30	31	25.66	6.72414

## Sheet: Figure 2
male	diet	diet_protein	diet_carb	diet_fat	body_weight	ave_testis	ave_sv	sperm_conc	sperm_motility	sperm_morph	sperm_viable	H2DCFDA_change	lean_weight	body_fat_percent	testis_TAC	sperm_TAC	testis_GSH	testosterone
7	1	7	33	60	25.3	0.096	0.1095	55.125	80	25.5	47.5	598	21.93	5.95142	1.62529	8.948	440.751	0.89
8	1	7	33	60	25	0.112	0.113	47.9	70	20.5	59.7	2296.42	21.32	7.5	1.66502	13.4358	449.568	0.14
9	1	7	33	60	24.7	0.081	0.084	44.2	75	15.5	46	-135.499	21.53	5.71429	1.59316	8.52147	272.615	1.45
10	1	7	33	60	24.9	0.0925	0.1045	46.6	80	22.5	63.4	4237.82	21.31	8.60759	1.36963	8.38697	244.787	0.21
11	1	7	33	60	24.3	0.0945	0.12	56.9	60	15.5	36	666.375	20.37	7.78261	1.36919	7.51926	381.917	0.82
12	1	7	33	60	26.6	0.1005	0.1365	48.3	65	17.5	44.3	7147.65	22.11	6.81452	1.38211	8.926	358.01	0.29
7	2	7	78	15	27.2	0.084	0.1575	42.9	65	17	46.2	2774.21	22.27	7.6834	1.65137	7.97526	500.435	0.35
8	2	7	78	15	25.2	0.094	0.1165	48.3	65	17.5	35.4	4207.63	20.69	9.95868	1.45307	8.49845	192.813	20.2
9	2	7	78	15	23.7	0.1015	0.099	37.7	65	16	43.6		19.39	10.0885	1.4807	8.29439	307.153	0.13
10	2	7	78	15	24.4	0.0945	0.1325	44.3	65	12.5	38.6	-1758.51	19.7	9.91416	1.56469	8.96357	309.38	13.38
11	2	7	78	15	32.4	0.099	0.1725	32.6	55	14.5	49.7	3221.41	23.06	11.8889	1.47325	9.51011	396.168	1.43
12	2	7	78	15	22.1	0.0905	0.0575	42.3	70	14	37.6	4268.64	17.08	12.8708	1.25119	8.82458	447.296	0.15
7	3	14	56	30	39.5	0.0935	0.191	26.3	60	23	36.4	777	26.86	17.8209	1.43545	10.3595	435.635	0.58
8	3	14	56	30	33	0.1035	0.169	39.5	70	16.5	39.4	2106.07	29.2	3.47267	1.74724	8.3573	185.943	1.41
9	3	14	56	30	34.8	0.0985	0.186	42.2	70	17.5	52.5	2970.86	28.41	4.59547	1.60888	9.15666	303.691	0.43
10	3	14	56	30	39	0.073	0.1175	55.5	60	17.5	44.2	3718.12	29.97	11.5833	1.48675	8.9523	317.886	3.04
11	3	14	56	30	34.3	0.108	0.1645	42.6	65	24	44.5	4976.73	26.34	26.6142	1.68797	8.65931	391.041	1.09
12	3	14	56	30	33	0.101	0.1715	47	65	9.5	21.6	8423.64	25.8	12.1753	1.55192	8.76448	419.009	1.13
7	4	14	26	60	30.8	0.0935	0.165	45.7	70	14.5	36.1	3441	28.57	2.68852	1.68886	8.01976	205.821	18.46
8	4	14	26	60	28.7	0.106	0.172	51.3	70	19	37.3	4846.31	27.22	1.777	1.53114	8.40026	198.537	0.32
9	4	14	26	60	33	0.105	0.14	36.6	60	21	42	1794.85	28.31	4.26282	1.42819	7.66687	327.851	7.94
10	4	14	26	60	28.6	0.0885	0.141	32.8	60	10	34	41.3647	24.07	8.21818	1.42658	9.1157	482.611	3.66
11	4	14	26	60	30.7	0.107	0.163	51	75	13.5	52.3	4029.31	24.72	9.55479	1.22272	8.87905	355.998	0.29
12	4	14	26	60	29.5	0.104	0.1555	59.5	65	13	48.3	5104	24.05	8.90909	1.53842	8.5654	345.63	0.4
7	5	21	64	15	28.5	0.0575	0.091	47.7	55	7.5	27.1	1532.95	24.77	6.52482	1.47172	7.47662	205.657	0.41
8	5	21	64	15	33.2	0.1065	0.1585	44.6	55	7.5	29	3540.63	26.91	6.19529	1.46015	8.523	226.606	2.68
9	5	21	64	15	30.3	0.0985	0.1755	36.5	50	10.5	23.8	9118.33	25.36	3.42561	1.52458	7.09612	328.581	0.43
10	5	21	64	15	31.2	0.1005	0.1825	54	65	11	46	1753.46	28.55	2.59868	1.41968	7.57936	540.897	11.94
11	5	21	64	15	31.2	0.102	0.164	71.3	65	3.22222	29	3597.82	29.09	3.05195	1.56997	6.93328	438.772	1.3
12	5	21	64	15	29.6	0.1055	0.16	40.9	65	16.5	40.5	3930.66	27.48	3.60269	1.35642	8.65743	403.411	0.17
7	6	21	34	45	32	0.061	0.101	37.4	70	11	47.3	2426.84	29.93	0.984127	1.64049	9.19655	228.427	0.42
8	6	21	34	45	29.2	0.1005	0.1395	29.1	70	10.5	43.6	1818.92	26.08	2.91367	1.55481	9.16893	184.854	10.66
9	6	21	34	45	31.4	0.1015	0.1505	34.8	65	8.5	30.5	8852.24	27.66	0.859107	1.65707	7.24955	321.573	7.7
10	6	21	34	45	34.4	0.1005	0.1695	44.25	75	15	39.5	-4334.22	28.27	3.57377	1.41366	9.666	553.099	0.74
11	6	21	34	45	32.2	0.099	0.167	61.8	65	17	41.8	555.943	27.97	3.91447	1.36582	8.32687	371.521	0.38
12	6	21	34	45	36.3	0.1035	0.1645	48.8	75	12	48.8	264.331	28.34	9.82143	1.47149	10.2201	366.628	0.25
7	7	30	40	30	36.6	0.1115	0.182	59	60	22	42.5	6037.64	28.74	10.7576	1.41783	7.95532	212.306	2.32
8	7	30	40	30	34.4	0.1145	0.177	32.6	70	19.5	54.3	5504.37	29.02	4.61783	1.52873	8.5767	423.889	1.55
9	7	30	40	30	32	0.1045	0.1765	43.2	65	14.5	40.7		29.63	3.90625	1.56258	7.47509	672.881	0.21
10	7	30	40	30	33.9	0.0575	0.1125	44	70	10.5	46.6	509.636	29.14	9.49102	1.31988	9.36549	315.172	13.66
11	7	30	40	30	33.3	0.115	0.1715	50.5	75	14.5	43.7	1330.87	28.66	6.80251	1.44962	8.45271	412.225	0.82
12	7	30	40	30	32.8	0.089	0.1865	35.9	60	12.5	23.9	8082.39	27.02	7.44262	1.33456	8.25926	378.67	1.29
7	8	35	20	45	32	0.1045	0.16	47.6	75	23.5	43.4	2072	24.89	17.5806	1.54445	8.66262	233.553	5.84
8	8	35	20	45	30.8	0.103	0.1675	43.3	75	18.5	43.5	5121.15	23.32	14.1115	1.37447	9.52949	441.773	0.2
9	8	35	20	45	30.6	0.1095	0.148	46.2	55	25.5	66.5	-923.21	24.4	16.0208	1.62183	8.71172	620.836	0.57
10	8	35	20	45	29.5	0.103	0.149	19.58	50	13.5	37.3	-2759.33	27.89	1.42857	1.45652	11.4296	291.76	5.48
11	8	35	20	45	32.6	0.1075	0.175	61	70	17	52.6	5104.47	29.26	1.73077	1.46885	9.57585	387.214	13.54
12	8	35	20	45	30	0.102	0.1585	51.4	60	12.5	45	3135.65	24.85	6.26335	1.44111	8.93727	379.138	0.67
7	9	42	43	15	34.3	0.109	0.179	42.6	55	18	46.7	3046	27.93	8.92405	1.3489	8.36497	461.073	13.92
8	9	42	43	15	29.8	0.094	0.1625	38.3	75	21	65.9	2534.22	27.36	3.37884	1.27653	8.28672	198.219	1.43
9	9	42	43	15	37.5	0.112	0.185	48.5	65	21	45.5		28.38	13.7685	1.55101	7.24188	273.635	22.8
10	9	42	43	15	34.2	0.0655	0.124	53.4	70	9.5	41.4	881.752	24.75	16.4935	1.36303	8.13342	320.805	1.98
11	9	42	43	15	40.1	0.1085	0.1875	43.2	65	17.5	40.8	4170.99	24.42	19.2429	1.44625	8.38322	368.368	1.56
12	9	42	43	15	34.9	0.101	0.163	58.1	60	14	21.4	12001.7	24.3	19.4969	1.42174	7.92682	429.181	0.49
7	10	50	20	30	32.5	0.1025	0.1725	41.6	70	15.5	41.9	1209	27.78	8.53125	1.60283	9.78418	508.086	17.8
8	10	50	20	30	39.1	0.111	0.2035	56.3	50	13	42.3	2695.45	28.82	15.1507	1.50057	8.83292	149.037	18.32
9	10	50	20	30	35.6	0.103	0.17	45.8	60	18.5	46.4	348.858	29.04	6.17284	1.16401	8.9035	291.826	1.36
10	10	50	20	30	31.9	0.0785	0.1355	33.1	70	22	51.3	6634.38	30.29	1.82109	1.46474	9.48006	316.52	0.29
11	10	50	20	30	31.3	0.104	0.145	44.3	60	15.5	42.2		29.13	2.12219	1.34688	8.2818	419.337	0.4
12	10	50	20	30	28.1	0.0925	0.1555	31.5	70	21.5	42.3		25.9	5.42553	1.27746	9.08377	411.795	0.31

## Sheet: Figure 3
male	diet	Diet % Protein	Diet % Carbs	Diet % Fat	weight at sacrifice (g)	average testis weight - relative (g)	average seminal vesicle weight - absolute (g)
1	1	7	33	60	25.3	0.00379447	0.1095
2	1	7	33	60	25	0.00448	0.113
3	1	7	33	60	24.7	0.00327935	0.084
4	1	7	33	60	24.9	0.00371486	0.1045
5	1	7	33	60	24.3	0.00388889	0.12
6	1	7	33	60	26.6	0.00377819	0.1365
1	2	7	78	15	27.2	0.00308823	0.1575
2	2	7	78	15	25.2	0.00373016	0.1165
3	2	7	78	15	23.7	0.0042827	0.099
4	2	7	78	15	24.4	0.00387295	0.1325
5	2	7	78	15	32.4	0.00305556	0.1725
6	2	7	78	15	22.1	0.00409502	0.0575
1	3	14	56	30	39.5	0.00236709	0.191
2	3	14	56	30	33	0.00313636	0.169
3	3	14	56	30	34.8	0.00283046	0.186
4	3	14	56	30	39	0.0018718	0.1175
5	3	14	56	30	34.3	0.00314869	0.1645
6	3	14	56	30	33	0.00306061	0.1715
1	4	14	26	60	30.8	0.00303571	0.165
2	4	14	26	60	28.7	0.00369338	0.172
3	4	14	26	60	33	0.00318182	0.14
4	4	14	26	60	28.6	0.00309441	0.141
5	4	14	26	60	30.7	0.00348534	0.163
6	4	14	26	60	29.5	0.00352542	0.1555
1	5	21	64	15	28.5	0.00201754	0.091
2	5	21	64	15	33.2	0.00320783	0.1585
3	5	21	64	15	30.3	0.00325083	0.1755
4	5	21	64	15	31.2	0.00322115	0.1825
5	5	21	64	15	31.2	0.00326923	0.164
6	5	21	64	15	29.6	0.00356419	0.16
1	6	21	34	45	32	0.00190625	0.101
2	6	21	34	45	29.2	0.00344178	0.1395
3	6	21	34	45	31.4	0.00323248	0.1505
4	6	21	34	45	34.4	0.00292151	0.1695
5	6	21	34	45	32.2	0.00307453	0.167
6	6	21	34	45	36.3	0.00285124	0.1645
1	7	30	40	30	36.6	0.00304645	0.182
2	7	30	40	30	34.4	0.00332849	0.177
3	7	30	40	30	32	0.00326562	0.1765
4	7	30	40	30	33.9	0.00169616	0.1125
5	7	30	40	30	33.3	0.00345345	0.1715
6	7	30	40	30	32.8	0.00271341	0.1865
1	8	35	20	45	32	0.00326562	0.16
2	8	35	20	45	30.8	0.00334416	0.1675
3	8	35	20	45	30.6	0.00357843	0.148
4	8	35	20	45	29.5	0.00349153	0.149
5	8	35	20	45	32.6	0.00329755	0.175
6	8	35	20	45	30	0.0034	0.1585
1	9	42	43	15	34.3	0.00317784	0.179
2	9	42	43	15	29.8	0.00315436	0.1625
3	9	42	43	15	37.5	0.00298667	0.185
4	9	42	43	15	34.2	0.0019152	0.124
5	9	42	43	15	40.1	0.00270574	0.1875
6	9	42	43	15	34.9	0.00289398	0.163
1	10	50	20	30	32.5	0.00315385	0.1725
2	10	50	20	30	39.1	0.00283887	0.2035
3	10	50	20	30	35.6	0.00289326	0.17
4	10	50	20	30	31.9	0.00246081	0.1355
5	10	50	20	30	31.3	0.00332268	0.145
6	10	50	20	30	28.1	0.00329182	0.1555
7	1	7	33	60	22.7	0.00413656	0.0905
8	1	7	33	60	24.7	0.00369433	0.1275
9	1	7	33	60	24.7	0.00397773	0.11495
10	1	7	33	60	28.6	0.00315909	0.08705
11	1	7	33	60	24.87	0.00341375	0.1128
12	1	7	33	60	23.3	0.00338627	0.0619
7	2	7	78	15	28.7	0.00333275	0.1561
8	2	7	78	15	28	0.003475	0.1391
9	2	7	78	15	22.1	0.00399548	0.06125
10	2	7	78	15	25.9	0.00416409	0.1331
11	2	7	78	15	31.2	0.00299199	0.1653
12	2	7	78	15	41	0.00215732	0.18095
7	3	14	56	30	33.4	0.00296856	0.1609
8	3	14	56	30	31	0.00270806	0.13605
9	3	14	56	30	42.8	0.00212734	0.154
10	3	14	56	30	33.2	0.00270181	0.1845
11	3	14	56	30	37.3	0.00243968	0.1835
12	3	14	56	30	30.7	0.00324267	0.1814
7	4	14	26	60	26.1	0.0030249	0.1081
8	4	14	26	60	27.6	0.00343659	0.13045
9	4	14	26	60	28.7	0.00362544	0.13865
10	4	14	26	60	27	0.00397037	0.1103
11	4	14	26	60	30.14	0.00340577	0.17025
12	4	14	26	60	26.4	0.00385227	0.1413
7	5	21	64	15	36.3	0.00229477	0.1546
8	5	21	64	15	34.7	0.00296398	0.15395
9	5	21	64	15	43.4	0.00258064	0.20835
10	5	21	64	15	30.3	0.00310891	0.15555
11	5	21	64	15	33.5	0.00324179	0.18435
12	5	21	64	15	36	0.00310278	0.1815
7	6	21	34	45	31.61	0.00355584	0.1426
8	6	21	34	45	30.8	0.0032013	0.16645
9	6	21	34	45	29.7	0.00297643	0.13795
10	6	21	34	45	31.7	0.00293849	0.15955
11	6	21	34	45	32.8	0.0025564	0.13375
12	6	21	34	45	31.1	0.00283762	0.1568
7	7	30	40	30	39.8	0.00255151	0.1823
8	7	30	40	30	40.1	0.00242145	0.1643
9	7	30	40	30	37.67	0.00255907	0.1539
10	7	30	40	30	45	0.00226556	0.16675
11	7	30	40	30	35.86	0.00292526	0.1611
12	7	30	40	30	33.3	0.00319369	0.1666
7	8	35	20	45	30.5	0.00303115	0.16025
8	8	35	20	45	27.7	0.00338628	0.1564
9	8	35	20	45	34.5	0.00306232	0.1819
10	8	35	20	45	34.3	0.00301895	0.15365
11	8	35	20	45	35.17	0.00296133	0.16135
12	8	35	20	45	30.3	0.00348845	0.14175
7	9	42	43	15	28.7	0.00368989	0.14595
8	9	42	43	15	26.4	0.00397159	0.1207
9	9	42	43	15	32.2	0.00278106	0.1376
10	9	42	43	15	29.1	0.00308935	0.147
11	9	42	43	15	29.4	0.00295918	0.17415
12	9	42	43	15	35.2	0.00283665	0.2079
7	10	50	20	30	33.5	0.00306119	0.1749
8	10	50	20	30	35.2	0.00273296	0.17305
9	10	50	20	30	29.5	0.00374407	0.18615
10	10	50	20	30	33.4	0.00325299	0.23825
11	10	50	20	30	35.85	0.00285216	0.13945
12	10	50	20	30	31	0.0034871	0.1665

## Sheet: Figure 4
male	diet	Diet % Protein	Diet % Carbs	Diet % Fat	sperm motility (%)	abnormal sperm morphology (%)	Sperm total antioxidant capacity (nmol/uL trolox equivalent)
7	1	7	33	60	80	25.5	8.948
8	1	7	33	60	70	20.5	13.4358
9	1	7	33	60	75	15.5	8.52147
10	1	7	33	60	80	22.5	8.38697
11	1	7	33	60	60	15.5	7.51926
12	1	7	33	60	65	17.5	8.926
7	2	7	78	15	65	17	7.97526
8	2	7	78	15	65	17.5	8.49845
9	2	7	78	15	65	16	8.29439
10	2	7	78	15	65	12.5	8.96357
11	2	7	78	15	55	14.5	9.51011
12	2	7	78	15	70	14	8.82458
7	3	14	56	30	60	23	10.3595
8	3	14	56	30	70	16.5	8.3573
9	3	14	56	30	70	17.5	9.15666
10	3	14	56	30	60	17.5	8.9523
11	3	14	56	30	65	24	8.65931
12	3	14	56	30	65	9.5	8.76448
7	4	14	26	60	70	14.5	8.01976
8	4	14	26	60	70	19	8.40026
9	4	14	26	60	60	21	7.66687
10	4	14	26	60	60	10	9.1157
11	4	14	26	60	75	13.5	8.87905
12	4	14	26	60	65	13	8.5654
7	5	21	64	15	55	7.5	7.47662
8	5	21	64	15	55	7.5	8.523
9	5	21	64	15	50	10.5	7.09612
10	5	21	64	15	65	11	7.57936
11	5	21	64	15	65	3.22222	6.93328
12	5	21	64	15	65	16.5	8.65743
7	6	21	34	45	70	11	9.19655
8	6	21	34	45	70	10.5	9.16893
9	6	21	34	45	65	8.5	7.24955
10	6	21	34	45	75	15	9.666
11	6	21	34	45	65	17	8.32687
12	6	21	34	45	75	12	10.2201
7	7	30	40	30	60	22	7.95532
8	7	30	40	30	70	19.5	8.5767
9	7	30	40	30	65	14.5	7.47509
10	7	30	40	30	70	10.5	9.36549
11	7	30	40	30	75	14.5	8.45271
12	7	30	40	30	60	12.5	8.25926
7	8	35	20	45	75	23.5	8.66262
8	8	35	20	45	75	18.5	9.52949
9	8	35	20	45	55	25.5	8.71172
10	8	35	20	45	50	13.5	11.4296
11	8	35	20	45	70	17	9.57585
12	8	35	20	45	60	12.5	8.93727
7	9	42	43	15	55	18	8.36497
8	9	42	43	15	75	21	8.28672
9	9	42	43	15	65	21	7.24188
10	9	42	43	15	70	9.5	8.13342
11	9	42	43	15	65	17.5	8.38322
12	9	42	43	15	60	14	7.92682
7	10	50	20	30	70	15.5	9.78418
8	10	50	20	30	50	13	8.83292
9	10	50	20	30	60	18.5	8.9035
10	10	50	20	30	70	22	9.48006
11	10	50	20	30	60	15.5	8.2818
12	10	50	20	30	70	21.5	9.08377

## Sheet: Figure 5
male	diet	Diet % Protein	Diet % Carbs	Seminiferous tubule count	Seminiferous tubule vacuolation	Seminiferous tubule diameter
1	1	7	33	19	5	502.056
2	1	7	33	15	5	609.655
3	1	7	33	18	5	500.893
4	1	7	33	17	3	578.099
5	1	7	33	18	3	513.678
6	1	7	33	14	2	636.321
1	2	7	78	13	2	562.399
2	2	7	78	16	1	506.243
3	2	7	78	12	1	477.804
4	2	7	78	7	0	963.605
5	2	7	78	11	1	626.632
6	2	7	78	13	1	510.156
1	3	14	56	15	5	531.969
2	3	14	56	15	3	585.563
3	3	14	56	11	1	613.817
4	3	14	56	15	5	653.659
5	3	14	56	7	2	561.438
6	3	14	56	9	3	667.296
1	4	14	26	20	5	509.644
2	4	14	26	11	5	679.103
3	4	14	26	14	6	488.529
4	4	14	26	13	1	569.171
5	4	14	26	13	6	514.989
6	4	14	26	15	2	516.6
1	5	21	64	16	3	508.176
2	5	21	64	14	4	536.448
3	5	21	64	14	6	564.879
4	5	21	64	14	2	487.41
5	5	21	64	17	5	505.996
6	5	21	64	16	1	565.076
1	6	21	34	14	1	497.959
2	6	21	34	14	5	492.612
3	6	21	34	9	4	597.35
4	6	21	34	15	5	454.128
5	6	21	34	15	5	517.686
6	6	21	34	14	5	591.151
1	7	30	40	7	2	585.592
2	7	30	40	10	5	693.062
3	7	30	40	13	2	661.908
4	7	30	40	12	1	503.877
5	7	30	40	14	5	601.351
6	7	30	40	9	2	539.59
1	8	35	20	20	2	527.832
2	8	35	20	15	5	540.857
3	8	35	20	19	3	483.563
4	8	35	20	24	5	454.802
5	8	35	20	15	5	511.139
6	8	35	20	13	1	577.622
1	9	42	43	14	5	534.213
2	9	42	43	14	5	566.223
3	9	42	43	14	6	616.342
4	9	42	43	17	5	498.568
5	9	42	43	12	6	597.085
6	9	42	43	12	3	567.727
1	10	50	20	13	4	613.503
2	10	50	20	13	3	508.257
3	10	50	20	15	5	476.91
4	10	50	20	9	6	628.567
5	10	50	20	13	5	562.775
6	10	50	20	13	5	535.932

## Sheet: Figure 6
male	diet	Diet % Protein	Diet % Carbs	Diet % Fat	HSD17B3		male	diet	Diet % Protein	Diet % Carbs	Diet % Fat	Testes total antioxidant capacity (nmol/uL trolox equivalent)
1	1	7	33	60	0.8885		7	1	7	33	60	1.62529
2	1	7	33	60	1.041		8	1	7	33	60	1.66502
3	1	7	33	60	0.7325		9	1	7	33	60	1.59316
4	1	7	33	60	1.002		10	1	7	33	60	1.36963
5	1	7	33	60	0.4859		11	1	7	33	60	1.36919
6	1	7	33	60	0.6675		12	1	7	33	60	1.38211
1	2	7	78	15	0.962		7	2	7	78	15	1.65137
2	2	7	78	15	0.8363		8	2	7	78	15	1.45307
3	2	7	78	15	0.5716		9	2	7	78	15	1.4807
4	2	7	78	15	0.4645		10	2	7	78	15	1.56469
5	2	7	78	15	0.7391		11	2	7	78	15	1.47325
6	2	7	78	15	1.001		12	2	7	78	15	1.25119
1	3	14	56	30	0.9121		7	3	14	56	30	1.43545
2	3	14	56	30	0.879		8	3	14	56	30	1.74724
3	3	14	56	30	0.9583		9	3	14	56	30	1.60888
4	3	14	56	30	1.249		10	3	14	56	30	1.48675
5	3	14	56	30	0.7054		11	3	14	56	30	1.68797
6	3	14	56	30	0.659		12	3	14	56	30	1.55192
1	4	14	26	60	1.048		7	4	14	26	60	1.68886
2	4	14	26	60	0.7151		8	4	14	26	60	1.53114
3	4	14	26	60	0.752		9	4	14	26	60	1.42819
4	4	14	26	60	0.4886		10	4	14	26	60	1.42658
5	4	14	26	60	0.8645		11	4	14	26	60	1.22272
6	4	14	26	60	1.01		12	4	14	26	60	1.53842
1	5	21	64	15	1.079		7	5	21	64	15	1.47172
2	5	21	64	15	1.056		8	5	21	64	15	1.46015
3	5	21	64	15	0.6582		9	5	21	64	15	1.52458
4	5	21	64	15	0.9823		10	5	21	64	15	1.41968
5	5	21	64	15	0.687		11	5	21	64	15	1.56997
6	5	21	64	15	0.7079		12	5	21	64	15	1.35642
1	6	21	34	45	0.8873		7	6	21	34	45	1.64049
2	6	21	34	45	1.047		8	6	21	34	45	1.55481
3	6	21	34	45	0.9015		9	6	21	34	45	1.65707
4	6	21	34	45	0.8845		10	6	21	34	45	1.41366
5	6	21	34	45	0.8904		11	6	21	34	45	1.36582
6	6	21	34	45			12	6	21	34	45	1.47149
1	7	30	40	30	0.8538		7	7	30	40	30	1.41783
2	7	30	40	30	0.7681		8	7	30	40	30	1.52873
3	7	30	40	30	0.6506		9	7	30	40	30	1.56258
4	7	30	40	30	1.031		10	7	30	40	30	1.31988
5	7	30	40	30	0.7167		11	7	30	40	30	1.44962
6	7	30	40	30			12	7	30	40	30	1.33456
1	8	35	20	45	1.178		7	8	35	20	45	1.54445
2	8	35	20	45	1.073		8	8	35	20	45	1.37447
3	8	35	20	45	0.7369		9	8	35	20	45	1.62183
4	8	35	20	45	0.5818		10	8	35	20	45	1.45652
5	8	35	20	45	0.9596		11	8	35	20	45	1.46885
6	8	35	20	45	0.9412		12	8	35	20	45	1.44111
1	9	42	43	15	1.257		7	9	42	43	15	1.3489
2	9	42	43	15	0.6228		8	9	42	43	15	1.27653
3	9	42	43	15	0.7664		9	9	42	43	15	1.55101
4	9	42	43	15	1.139		10	9	42	43	15	1.36303
5	9	42	43	15	0.9206		11	9	42	43	15	1.44625
6	9	42	43	15	0.7882		12	9	42	43	15	1.42174
1	10	50	20	30	1.345		7	10	50	20	30	1.60283
2	10	50	20	30	0.8883		8	10	50	20	30	1.50057
3	10	50	20	30	0.9206		9	10	50	20	30	1.16401
4	10	50	20	30	1.303		10	10	50	20	30	1.46474
5	10	50	20	30	0.9811		11	10	50	20	30	1.34688
6	10	50	20	30	0.8042		12	10	50	20	30	1.27746

## Sheet: Figure 7
male	diet	Diet % Protein	Diet % Carbs	Diet % Fat	GPX1	GPX4	GSS	STAR	GSR	NFE2L2	ADH5	SOD1	SOD2	SOD3	CAT
1	1	7	33	60	1.086	1.319	1.309	3.643	1.797	0.2665	1.814	39.83	5.541	0.00326	0.3116
2	1	7	33	60	0.9863	1.667	1.533	7.175	2.559	0.4399	2.271	40.36	4.509	0.025	0.4762
3	1	7	33	60	0.8881		2.475	6.589	2.454	0.4243	1.894	34.46	7.08	0.0217	0.3704
4	1	7	33	60	1.317		1.833	6.97	2.737	0.6449	1.927	42.73	4.007	0.00631	0.4435
5	1	7	33	60	0.6062		1.202	5.339	1.976	0.3025	1.838	30.65		0.0132	0.3996
6	1	7	33	60	0.6663		2.252	2.323	2.015	0.3572	1.532	25.88			0.2728
1	2	7	78	15	1.696	2.712	1.184	4.729	1.692	0.3913	1.812	32.73	4.44	0.0451	0.3303
2	2	7	78	15	1.052	1.685	1.474	5.387	2.311	0.462	1.859	29.53	5.903	0.0247	0.3862
3	2	7	78	15	0.6958	1.437	1.234	4.346	2.603	0.4698	1.325	32.79	3.237	0.00656	0.4043
4	2	7	78	15	0.5729	1.079	0.8937	3.742	1.672	0.2892	1.768	24.39	3.688	0.00928	0.2781
5	2	7	78	15	0.8158	1.784	1.182	4.704	2.109	0.3656	2.076	29.32	4.905	0.0275	0.3502
6	2	7	78	15	1.246	1.648	1.925	6.937		0.5509		33.98
1	3	14	56	30	1.683	2.578	1.579	2.173	1.42	0.2262	1.972	31.26	2.855	0.00759	0.2432
2	3	14	56	30	0.8348	2.07	1.943	6.801	2.503	0.3108	2.224	33.81	4.278	0.0235	0.3279
3	3	14	56	30	0.8475	2.714	1.962	6.013	2.464	0.3904	2.138	34.01	5.27	0.0284	0.3481
4	3	14	56	30	1.51	1.717	1.966	9.239	2.729	0.5993	2.58	33.12		0.00734	0.5604
5	3	14	56	30	0.6813	1.53	1.852	4.75	2.285	0.3261	2.046	26.87			0.3338
6	3	14	56	30	0.6782	1.649	1.803	5.83	2.025		1.819	27.9			0.3271
1	4	14	26	60	1.342	1.931	1.524	5.056	1.953	0.3202	2.108	34.02	2.952	0.0253	0.3154
2	4	14	26	60	1.02	1.56	1.877	4.36	1.987	0.3983	1.739	33.41	4.785	0.0237	0.3714
3	4	14	26	60	0.8786	1.734	1.249	6.586	2.64	0.4526	2.161	30.71	5.625	0.0281	0.4061
4	4	14	26	60	0.4552	1.528	0.8047	3.044	1.257	0.2575	1.07	21.14	2.895		0.2491
5	4	14	26	60	1.023	1.491	1.64	6.076	1.889	0.3979	1.707	33.05	3.644		0.3539
6	4	14	26	60	1.076		1.635	5.871	2.085	0.4497	1.996	31.02	4.463		0.4205
1	5	21	64	15	1.392	1.752	1.098	3.45	2.354	0.3816	2.265	33.35	3.05	0.00471	0.3582
2	5	21	64	15	0.4148	0.7458	0.5921	5.157	1.249	0.1866	1.096	15.74	1.864	0.00437	0.1701
3	5	21	64	15	0.6278	1.637	1.105	2.688	1.751	0.2967	1.594	30.78	3.806	0.00927	0.2655
4	5	21	64	15	1.189	1.509	1.455	5.73	2.204	0.4918	1.869	30.82	4.808	0.0327	0.4258
5	5	21	64	15	0.7093	1.571	1.422	6.466	1.965	0.3206	1.637	28.21	3.266	0.0118	0.3372
6	5	21	64	15	0.7087	1.502	1.16	5.525	1.856	0.2995	1.645	30.05		0.00809	0.292
1	6	21	34	45	2.044	3.328	0.9422	8.585	1.274	0.3139	1.615	32.17	2.184	0.0166	0.2172
2	6	21	34	45	1.01	1.573	1.159	10.12	1.899	0.4034	1.622	29.83	4.614	0.0103	0.3909
3	6	21	34	45	0.8876	1.636	1.58	4.461	2.61	0.4172	2.378	37.22	4.047	0.0102	0.4343
4	6	21	34	45	0.8299	1.584	1.404	4.525	2.373	0.412	1.796	29.29	4.135	0.0139	0.3424
5	6	21	34	45	0.7339	1.54	1.737	5.72	2.183	0.3578	1.612	27.17	4.905	0.0181	0.3596
6	6	21	34	45	1.113		1.663		2.072	0.4364	1.956	29.47			0.4148
1	7	30	40	30	1.284	2.866	1.323	3.313	2.09	0.3214	1.807	30.15	3.67	0.0151	0.2842
2	7	30	40	30	0.8945	1.246	1.084	5.679	1.937	0.3894	1.664	25.32	3.455	0.0164	0.3288
3	7	30	40	30	0.7625	1.662	1.422	2.985	2.292	0.414	1.736	28.07	3.893	0.0149	0.3219
4	7	30	40	30	1.246	1.825	1.541	7.317	2.559	0.5558	2.061	29.11	5.326	0.021	0.4406
5	7	30	40	30	0.7343	1.534	1.702	6.715	2.023	0.3219	1.729	27.19	3.138	0.0148	0.3003
6	7	30	40	30
1	8	35	20	45	2.072	3.242	1.832	2.629	1.602	0.4353	1.832	32.61	2.926	0.0268	0.3049
2	8	35	20	45	1.263	2.335	2.216	7.46	2.004	0.466	2.006	31.95	5.456	0.0134	0.4397
3	8	35	20	45	0.8351	2.322	1.024	5.038	2.037	0.302	1.806	31.07	4.272	0.00628	0.3097
4	8	35	20	45	0.6462	1.487	1.005	4.048	1.71	0.4611	1.356	24.92	3.305	0.0225	0.2833
5	8	35	20	45	1.044	1.635	1.904	5.293	2.552	0.3722	1.956	29.38	4.855	0.0331	0.4286
6	8	35	20	45	1.322	2.535		5.845	2.348		1.967	30.09	5.285		0.4116
1	9	42	43	15	1.642	2.623	0.9023	2.783	1.694	0.3315	1.76	27.64	3.66	0.0114	0.3358
2	9	42	43	15	0.9582	2.409	1.25	5.217	2.228	0.3997	1.876	31.56	4.489	0.0186	0.358
3	9	42	43	15	1.042	2.342	1.072	4.757	2.064	0.6158	1.72	27.47	4.2	0.0117	0.3496
4	9	42	43	15	1.412	1.938	1.601	4.759	2.519	0.5096	2.121	33.55	6.17	0.0281	0.4892
5	9	42	43	15	1.077	2.54	1.486	5.891	2.696	0.4447	2.102	25.43	5.523	0.0141	0.4674
6	9	42	43	15	0.8294		1.423	5.405	2.249		1.948	31.27	4.714	0.00841	0.3563
1	10	50	20	30	2.44	4.537	1.288	2.793	1.516	0.3043	1.898	35.68	3.123	0.0533	0.2352
2	10	50	20	30	1.381	2.183	1.488	6.372	2.303	0.4904	1.819	28.98	5.236	0.0294	0.4453
3	10	50	20	30	1.016	2.487	1.015	5.731	2.189	0.4117	1.934	39.8	5.69	0.0301	0.4202
4	10	50	20	30	1.709	2.879	1.323	7.341	2.831	0.6523	2.529	29.55	5.354	0.00988	0.5062
5	10	50	20	30	1.218	1.627	1.245	7.23	2.338	0.5645	2.171	24.87	4.81	0.0242	0.4975
6	10	50	20	30	1.218	1.58	1.13	5.103	2.05	0.3819	1.774			0.0136	0.4534
